# Supplementary material for: The human gut and groundwater harbor non-photosynthetic bacteria belonging to a new candidate phylum sibling to Cyanobacteria
Source: eLife. 2013 Oct 1;2:e01102. doi: 10.7554/eLife.01102 (PMC3787301; doi:10.7554/eLife.01102)
Supplement: Figure 5—source data 1. — DOI: http://dx.doi.org/10.7554/eLife.01102.014 [file elife01102s004.xlsx]

## Sheet: Sheet1
Figure 5 – Source data. List of 920 MEL-COGs, including their assigned phylum and KEGG Orthology (KO) identifier.
ACD20	MEL.A1	MEL.B1	MEL.B2	Phylogeny	KEGGID	KEGG category
ACD20_10278.33918.14G0009	MEL.A1_625	MEL.B1.002_19	MEL.B2.001_261	Multiple		Unclassified
ACD20_10278.33918.14G0011	MEL.A1_1786	MEL.B1.001_244	MEL.B2.008_7	No hit		Unclassified
ACD20_10278.33918.14G0018	MEL.A1_989	MEL.B1.001_68	MEL.B2.008_25	No hit		Unclassified
ACD20_10278.33918.14G0019	MEL.A1_990	MEL.B1.001_67	MEL.B2.008_24	Firmicutes	K00790	Metabolism
ACD20_10278.33918.14G0020	MEL.A1_1431	MEL.B1.004_156	MEL.B2.003_302	Multiple	K03798	Unclassified
ACD20_10278.33918.14G0021	MEL.A1_1801	MEL.B1.001_481	MEL.B2.002_339	Firmicutes	K00266	Metabolism
ACD20_10278.33918.14G0025	MEL.A1_323	MEL.B1.001_84	MEL.B2.003_146	Firmicutes	K07001	Unclassified
ACD20_10278.33918.14G0026	MEL.A1_80	MEL.B1.003_175	MEL.B2.002_487	Firmicutes	K08590	Unclassified
ACD20_10278.33918.14G0030	MEL.A1_1055	MEL.B1.005_250	MEL.B2.003_129	Proteobacteria	K01759	Multiple
ACD20_103728.33129.13G0001	MEL.A1_1416	MEL.B1.003_50	MEL.B2.006_13	No hit		Unclassified
ACD20_103728.33129.13G0003	MEL.A1_1685	MEL.B1.001_205	MEL.B2.001_145	Multiple	K03270	Metabolism
ACD20_103728.33129.13G0004	MEL.A1_1686	MEL.B1.001_495	MEL.B2.001_146	Multiple	K06041	Unclassified
ACD20_103728.33129.13G0006	MEL.A1_803	MEL.B1.004_115	MEL.B2.001_230	Multiple	K02112	Metabolism
ACD20_103728.33129.13G0007	MEL.A1_802	MEL.B1.004_114	MEL.B2.001_231	Multiple	K02114	Metabolism
ACD20_103728.33129.13G0008	MEL.A1_398	MEL.B1.002_7	MEL.B2.001_65	Multiple	K07009	Unclassified
ACD20_103728.33129.13G0010	MEL.A1_327	MEL.B1.004_71	MEL.B2.005_5	Not enough hits	K01625	Metabolism
ACD20_103728.33129.13G0011	MEL.A1_326	MEL.B1.004_72	MEL.B2.002_185	Deinococcus-Thermus	K00874	Metabolism
ACD20_103728.33129.13G0014	MEL.A1_1576	MEL.B1.007_97	MEL.B2.002_101	Firmicutes	K03438	Unclassified
ACD20_103728.33129.13G0015	MEL.A1_1577	MEL.B1.007_98	MEL.B2.002_100	No hit		Unclassified
ACD20_103728.33129.13G0016	MEL.A1_658	MEL.B1.006_7	MEL.B2.009_24	Multiple	K03587	Metabolism
ACD20_103728.33129.13G0017	MEL.A1_657	MEL.B1.006_8	MEL.B2.009_23	Firmicutes	K01928	Metabolism
ACD20_103728.33129.13G0020	MEL.A1_514	MEL.B1.007_52	MEL.B2.001_641	Firmicutes	K03437	Unclassified
ACD20_103728.33129.13G0021	MEL.A1_515	MEL.B1.007_53	MEL.B2.001_642	Proteobacteria	K01262	Unclassified
ACD20_103728.33129.13G0022	MEL.A1_664	MEL.B1.004_350	MEL.B2.003_277	Aquificae	K01255	Metabolism
ACD20_103728.33129.13G0023	MEL.A1_199	MEL.B1.004_51	MEL.B2.007_54	Cyanobacteria	K07769	Environmental Information Processing
ACD20_103728.33129.13G0025	MEL.A1_233	MEL.B1.003_268	MEL.B2.003_121	Multiple	K01834	Unclassified
ACD20_103728.33129.13G0026	MEL.A1_846	MEL.B1.005_183	MEL.B2.001_404	Firmicutes	K03783	Metabolism
ACD20_103728.33129.13G0029	MEL.A1_1564	MEL.B1.001_464	MEL.B2.008_23	No hit		Unclassified
ACD20_10947.14127.14G0001	MEL.A1_226	MEL.B1.001_482	MEL.B2.001_645	Multiple	K01791	Metabolism
ACD20_10947.14127.14G0003	MEL.A1_1280	MEL.B1.001_123	MEL.B2.003_197	Firmicutes	K06881	Unclassified
ACD20_10947.14127.14G0005	MEL.A1_1281	MEL.B1.001_122	MEL.B2.003_196	Firmicutes	K07058	Unclassified
ACD20_10947.14127.14G0007	MEL.A1_1819	MEL.B1.008_2	MEL.B2.002_432	Multiple		Unclassified
ACD20_10947.14127.14G0008	MEL.A1_401	MEL.B1.003_110	MEL.B2.008_30	Firmicutes	K01881	Genetic Information Processing
ACD20_10947.14127.14G0010	MEL.A1_967	MEL.B1.004_127	MEL.B2.001_412	Fibrobacteres	K01657	Metabolism
ACD20_10947.14127.14G0011	MEL.A1_1637	MEL.B1.007_38	MEL.B2.002_450	Firmicutes	K00278	Metabolism
ACD20_10947.14127.14G0012	MEL.A1_1636	MEL.B1.007_37	MEL.B2.002_449	Firmicutes	K00767	Metabolism
ACD20_109490.13163.14G0008	MEL.A1_254	MEL.B1.002_108	MEL.B2.001_197	Firmicutes	K00599	Metabolism
ACD20_109490.13163.14G0010	MEL.A1_889	MEL.B1.003_111	MEL.B2.002_482	Chlorobi	K02939	Genetic Information Processing
ACD20_11229.15067.13G0001	MEL.A1_1183	MEL.B1.001_239	MEL.B2.001_244	Cyanobacteria	K03797	Unclassified
ACD20_11229.15067.13G0003	MEL.A1_1588	MEL.B1.003_299	MEL.B2.002_296	Aquificae	K00943	Metabolism
ACD20_11229.15067.13G0005	MEL.A1_1799	MEL.B1.005_24	MEL.B2.008_26	Multiple		Unclassified
ACD20_11229.15067.13G0008	MEL.A1_105	MEL.B1.001_65	MEL.B2.006_41	Cyanobacteria	K00566	Genetic Information Processing
ACD20_11229.15067.13G0010	MEL.A1_1129	MEL.B1.001_477	MEL.B2.006_48	Firmicutes		Unclassified
ACD20_11235.20382.14G0002	MEL.A1_869	MEL.B1.002_107	MEL.B2.002_275	Multiple	K03763	Multiple
ACD20_11235.20382.14G0006	MEL.A1_933	MEL.B1.005_217	MEL.B2.003_108	Firmicutes	K01159	Genetic Information Processing
ACD20_11235.20382.14G0008	MEL.A1_71	MEL.B1.006_19	MEL.B2.001_403	Firmicutes	K09001	Unclassified
ACD20_11235.20382.14G0009	MEL.A1_73	MEL.B1.001_298	MEL.B2.004_65	Proteobacteria		Unclassified
ACD20_11235.20382.14G0011	MEL.A1_74	MEL.B1.001_297	MEL.B2.004_66	Proteobacteria	K03216	Unclassified
ACD20_11235.20382.14G0012	MEL.A1_75	MEL.B1.001_296	MEL.B2.004_68	Chloroflexi	K00995	Metabolism
ACD20_11235.20382.14G0017	MEL.A1_321	MEL.B1.002_118	MEL.B2.001_62	No hit		Unclassified
ACD20_11235.20382.14G0019	MEL.A1_1057	MEL.B1.004_237	MEL.B2.006_52	No hit		Unclassified
ACD20_11235.20382.14G0020	MEL.A1_1516	MEL.B1.004_89	MEL.B2.002_349	No hit		Unclassified
ACD20_11235.20382.14G0021	MEL.A1_1081	MEL.B1.004_296	MEL.B2.006_140	Multiple		Unclassified
ACD20_11235.20382.14G0023	MEL.A1_1076	MEL.B1.004_295	MEL.B2.003_186	Proteobacteria	K06940	Unclassified
ACD20_123527.2413.4G0003	MEL.A1_79	MEL.B1.003_174	MEL.B2.002_488	Proteobacteria	K07259	Metabolism
ACD20_12419.33813.14G0003	MEL.A1_1223	MEL.B1.001_54	MEL.B2.006_88	No hit		Unclassified
ACD20_12419.33813.14G0006	MEL.A1_728	MEL.B1.005_231	MEL.B2.004_169	Multiple		Unclassified
ACD20_12419.33813.14G0007	MEL.A1_563	MEL.B1.002_65	MEL.B2.003_279	Not enough hits		Unclassified
ACD20_12419.33813.14G0008	MEL.A1_564	MEL.B1.002_64	MEL.B2.003_280	Multiple		Unclassified
ACD20_12419.33813.14G0017	MEL.A1_1291	MEL.B1.001_488	MEL.B2.007_56	Multiple	K00895	Metabolism
ACD20_12419.33813.14G0019	MEL.A1_328	MEL.B1.004_70	MEL.B2.004_21	Aquificae	K01768	Multiple
ACD20_124768.4616.5G0001	MEL.A1_412	MEL.B1.005_136	MEL.B2.002_75	Elusimicrobia		Unclassified
ACD20_13.14967.14G0004	MEL.A1_798	MEL.B1.006_94	MEL.B2.008_6	Multiple		Unclassified
ACD20_13.14967.14G0005	MEL.A1_1764	MEL.B1.008_50	MEL.B2.002_70	Multiple		Unclassified
ACD20_13.14967.14G0006	MEL.A1_1763	MEL.B1.008_49	MEL.B2.002_69	Cyanobacteria		Unclassified
ACD20_13.14967.14G0007	MEL.A1_1762	MEL.B1.008_48	MEL.B2.002_68	Cyanobacteria		Unclassified
ACD20_13.14967.14G0009	MEL.A1_139	MEL.B1.003_51	MEL.B2.001_381	Firmicutes		Unclassified
ACD20_13167.11782.15G0003	MEL.A1_929	MEL.B1.001_15	MEL.B2.005_8	Cyanobacteria	K00210	Metabolism
ACD20_13167.11782.15G0004	MEL.A1_907	MEL.B1.010_3	MEL.B2.006_59	Cyanobacteria	K05356	Metabolism
ACD20_13167.11782.15G0006	MEL.A1_1147	MEL.B1.003_328	MEL.B2.006_14	Verrucomicrobia	K03446	Unclassified
ACD20_13167.11782.15G0007	MEL.A1_1692	MEL.B1.007_84	MEL.B2.004_167	Multiple	K03543	Unclassified
ACD20_13168.18683.14G0009	MEL.A1_1755	MEL.B1.005_79	MEL.B2.001_388	Firmicutes	K02238	Unclassified
ACD20_13168.18683.14G0010	MEL.A1_1326	MEL.B1.001_183	MEL.B2.002_295	No hit		Unclassified
ACD20_13168.18683.14G0011	MEL.A1_1412	MEL.B1.003_340	MEL.B2.005_19	Multiple	K09807	Unclassified
ACD20_13168.18683.14G0012	MEL.A1_1415	MEL.B1.001_490	MEL.B2.001_554	Firmicutes	K01480	Metabolism
ACD20_13168.18683.14G0013	MEL.A1_1054	MEL.B1.005_122	MEL.B2.001_315	Multiple	K00797	Metabolism
ACD20_13168.18683.14G0014	MEL.A1_1491	MEL.B1.002_117	MEL.B2.002_217	Firmicutes	K01611	Metabolism
ACD20_13174.12126.13G0003	MEL.A1_568	MEL.B1.004_15	MEL.B2.002_313	Multiple	K01868	Genetic Information Processing
ACD20_13174.12126.13G0008	MEL.A1_1346	MEL.B1.003_147	MEL.B2.004_121	Firmicutes	K00927	Metabolism
ACD20_13174.12126.13G0011	MEL.A1_824	MEL.B1.005_241	MEL.B2.003_172	Firmicutes	K01624	Metabolism
ACD20_13622.9810.13G0004	MEL.A1_1623	MEL.B1.006_174	MEL.B2.002_459	Chloroflexi	K03525	Metabolism
ACD20_13622.9810.13G0006	MEL.A1_86	MEL.B1.005_61	MEL.B2.003_114	Bacteroidetes	K02335	Multiple
ACD20_14190.9944.14G0004	MEL.A1_456	MEL.B1.001_285	MEL.B2.004_128	Cyanobacteria	K01939	Metabolism
ACD20_14190.9944.14G0008	MEL.A1_1302	MEL.B1.003_310	MEL.B2.001_202	No hit		Unclassified
ACD20_14190.9944.14G0009	MEL.A1_1303	MEL.B1.001_474	MEL.B2.001_203	Firmicutes	K04066	Genetic Information Processing
ACD20_14511.46098.14G0004	MEL.A1_1375	MEL.B1.007_67	MEL.B2.001_607	Not enough hits		Unclassified
ACD20_14511.46098.14G0006	MEL.A1_1422	MEL.B1.006_11	MEL.B2.002_320	Cyanobacteria	K06381	Unclassified
ACD20_14511.46098.14G0007	MEL.A1_469	MEL.B1.002_123	MEL.B2.002_321	No hit		Unclassified
ACD20_14511.46098.14G0008	MEL.A1_1760	MEL.B1.006_110	MEL.B2.006_114	Thermotogae		Unclassified
ACD20_14511.46098.14G0009	MEL.A1_1440	MEL.B1.005_179	MEL.B2.001_92	Multiple	K00971	K01809
ACD20_14511.46098.14G0012	MEL.A1_1026	MEL.B1.009_12	MEL.B2.001_82	Cyanobacteria		Unclassified
ACD20_14511.46098.14G0014	MEL.A1_1639	MEL.B1.006_30	MEL.B2.002_446	Cyanobacteria		Unclassified
ACD20_14511.46098.14G0018	MEL.A1_376	MEL.B1.001_349	MEL.B2.002_97	Proteobacteria	K01462	Unclassified
ACD20_14511.46098.14G0019	MEL.A1_375	MEL.B1.001_350	MEL.B2.002_98	Firmicutes	K00604	Multiple
ACD20_14511.46098.14G0024	MEL.A1_1672	MEL.B1.010_20	MEL.B2.003_228	Firmicutes	K01950	Metabolism
ACD20_14511.46098.14G0029	MEL.A1_617	MEL.B1.003_373	MEL.B2.001_77	Cyanobacteria		Unclassified
ACD20_14520.19719.14G0006	MEL.A1_977	MEL.B1.006_141	MEL.B2.008_36	No hit		Unclassified
ACD20_14657.24331.13G0002	MEL.A1_816	MEL.B1.004_185	MEL.B2.001_556	No hit		Unclassified
ACD20_14657.24331.13G0003	MEL.A1_817	MEL.B1.001_369	MEL.B2.004_139	Firmicutes	K03517	Metabolism
ACD20_14657.24331.13G0004	MEL.A1_983	MEL.B1.001_469	MEL.B2.006_44	Cyanobacteria	K02027	Unclassified
ACD20_14657.24331.13G0010	MEL.A1_153	MEL.B1.001_45	MEL.B2.002_220	Firmicutes	K03979	Unclassified
ACD20_14657.24331.13G0017	MEL.A1_1355	MEL.B1.001_424	MEL.B2.002_375	Thermotogae		Unclassified
ACD20_1620.88547.14G0002	MEL.A1_102	MEL.B1.004_98	MEL.B2.001_396	Cyanobacteria	K06207	Unclassified
ACD20_1620.88547.14G0005	MEL.A1_863	MEL.B1.007_35	MEL.B2.002_237	Multiple		Unclassified
ACD20_1620.88547.14G0013	MEL.A1_1134	MEL.B1.003_73	MEL.B2.001_272	Cyanobacteria		Unclassified
ACD20_1620.88547.14G0015	MEL.A1_1200	MEL.B1.001_404	MEL.B2.001_166	Firmicutes	K01582	Metabolism
ACD20_1620.88547.14G0018	MEL.A1_130	MEL.B1.004_305	MEL.B2.002_368	Not enough hits		Unclassified
ACD20_1620.88547.14G0019	MEL.A1_408	MEL.B1.002_12	MEL.B2.003_137	Cyanobacteria	K02884	Genetic Information Processing
ACD20_1620.88547.14G0020	MEL.A1_407	MEL.B1.002_13	MEL.B2.003_138	Firmicutes	K06948	Unclassified
ACD20_1620.88547.14G0021	MEL.A1_406	MEL.B1.006_56	MEL.B2.003_139	Fusobacteria	K03470	Genetic Information Processing
ACD20_1620.88547.14G0023	MEL.A1_1220	MEL.B1.004_153	MEL.B2.002_190	Firmicutes	K02314	Multiple
ACD20_1620.88547.14G0024	MEL.A1_1795	MEL.B1.003_386	MEL.B2.002_222	Cyanobacteria		Unclassified
ACD20_1620.88547.14G0025	MEL.A1_1796	MEL.B1.003_385	MEL.B2.002_223	Firmicutes	K00772	Metabolism
ACD20_1620.88547.14G0028	MEL.A1_217	MEL.B1.005_218	MEL.B2.001_330	Firmicutes		Unclassified
ACD20_1620.88547.14G0032	MEL.A1_838	MEL.B1.001_186	MEL.B2.002_72	Multiple	K09765	Unclassified
ACD20_1620.88547.14G0033	MEL.A1_839	MEL.B1.001_187	MEL.B2.002_71	Proteobacteria		Unclassified
ACD20_1620.88547.14G0036	MEL.A1_1352	MEL.B1.001_501	MEL.B2.004_45	Proteobacteria		Unclassified
ACD20_1620.88547.14G0046	MEL.A1_1602	MEL.B1.001_364	MEL.B2.004_137	Firmicutes	K03701	Genetic Information Processing
ACD20_1620.88547.14G0047	MEL.A1_250	MEL.B1.008_21	MEL.B2.001_116	No hit		Unclassified
ACD20_1620.88547.14G0053	MEL.A1_1385	MEL.B1.005_195	MEL.B2.006_123	Multiple	K02495	Metabolism
ACD20_1620.88547.14G0055	MEL.A1_1097	MEL.B1.006_177	MEL.B2.002_466	Firmicutes	K03978	Unclassified
ACD20_1620.88547.14G0056	MEL.A1_1122	MEL.B1.006_178	MEL.B2.002_465	No hit		Unclassified
ACD20_1620.88547.14G0059	MEL.A1_363	MEL.B1.003_223	MEL.B2.004_49	Multiple	K03702	Genetic Information Processing
ACD20_1620.88547.14G0063	MEL.A1_387	MEL.B1.001_351	MEL.B2.003_165	Firmicutes		Unclassified
ACD20_1620.88547.14G0064	MEL.A1_388	MEL.B1.001_352	MEL.B2.003_164	Multiple	K12600	Unclassified
ACD20_1620.88547.14G0066	MEL.A1_882	MEL.B1.004_302	MEL.B2.003_271	Firmicutes	K01870	Multiple
ACD20_1620.88547.14G0067	MEL.A1_997	MEL.B1.006_205	MEL.B2.003_230	Cyanobacteria		Unclassified
ACD20_1620.88547.14G0068	MEL.A1_550	MEL.B1.003_256	MEL.B2.002_493	Cyanobacteria	K03696	Unclassified
ACD20_1620.88547.14G0071	MEL.A1_521	MEL.B1.003_63	MEL.B2.002_140	Proteobacteria	K01839	Metabolism
ACD20_1620.88547.14G0072	MEL.A1_522	MEL.B1.003_64	MEL.B2.004_90	No hit		Unclassified
ACD20_1620.88547.14G0073	MEL.A1_795	MEL.B1.004_277	MEL.B2.002_273	Chloroflexi	K03574	Unclassified
ACD20_1620.88547.14G0074	MEL.A1_912	MEL.B1.002_109	MEL.B2.004_64	Not enough hits	K03800	Metabolism
ACD20_16493.43270.13G0001	MEL.A1_37	MEL.B1.003_137	MEL.B2.002_452	No hit		Unclassified
ACD20_16493.43270.13G0003	MEL.A1_623	MEL.B1.003_232	MEL.B2.004_11	No hit		Unclassified
ACD20_16493.43270.13G0006	MEL.A1_1448	MEL.B1.007_45	MEL.B2.003_200	Multiple	K06374	Unclassified
ACD20_16493.43270.13G0007	MEL.A1_1449	MEL.B1.007_44	MEL.B2.003_201	Cyanobacteria	K06373	Unclassified
ACD20_16493.43270.13G0008	MEL.A1_70	MEL.B1.006_176	MEL.B2.001_329	No hit		Unclassified
ACD20_16493.43270.13G0009	MEL.A1_69	MEL.B1.006_175	MEL.B2.001_328	No hit		Unclassified
ACD20_16493.43270.13G0010	MEL.A1_481	MEL.B1.004_106	MEL.B2.001_344	Firmicutes	K02563	Multiple
ACD20_16493.43270.13G0011	MEL.A1_482	MEL.B1.004_107	MEL.B2.001_343	Firmicutes	K03588	Cellular Processes
ACD20_16493.43270.13G0012	MEL.A1_483	MEL.B1.004_108	MEL.B2.001_342	Multiple	K01925	Metabolism
ACD20_16493.43270.13G0013	MEL.A1_484	MEL.B1.004_111	MEL.B2.001_341	Multiple	K01000	Metabolism
ACD20_16493.43270.13G0014	MEL.A1_485	MEL.B1.006_129	MEL.B2.001_340	Firmicutes	K01929	Metabolism
ACD20_16493.43270.13G0016	MEL.A1_1283	MEL.B1.003_277	MEL.B2.001_260	Firmicutes		Unclassified
ACD20_16493.43270.13G0019	MEL.A1_532	MEL.B1.001_136	MEL.B2.008_20	No hit		Unclassified
ACD20_16493.43270.13G0020	MEL.A1_533	MEL.B1.001_137	MEL.B2.008_19	Multiple	K07053	Unclassified
ACD20_16493.43270.13G0022	MEL.A1_729	MEL.B1.001_463	MEL.B2.004_113	Cyanobacteria		Unclassified
ACD20_16493.43270.13G0024	MEL.A1_544	MEL.B1.003_13	MEL.B2.002_322	Firmicutes	K01879	Genetic Information Processing
ACD20_16493.43270.13G0025	MEL.A1_353	MEL.B1.005_73	MEL.B2.003_20	No hit		Unclassified
ACD20_16493.43270.13G0026	MEL.A1_352	MEL.B1.005_72	MEL.B2.003_21	Cyanobacteria	K13292	Unclassified
ACD20_16493.43270.13G0029	MEL.A1_737	MEL.B1.004_297	MEL.B2.001_532	Firmicutes	K00602	Metabolism
ACD20_16493.43270.13G0030	MEL.A1_1268	MEL.B1.001_208	MEL.B2.002_271	Cyanobacteria		Unclassified
ACD20_16493.43270.13G0031	MEL.A1_1269	MEL.B1.001_209	MEL.B2.002_272	Firmicutes	K03657	Unclassified
ACD20_16493.43270.13G0033	MEL.A1_926	MEL.B1.006_97	MEL.B2.001_540	Synergistetes		Unclassified
ACD20_16493.43270.13G0036	MEL.A1_383	MEL.B1.006_95	MEL.B2.006_120	Firmicutes		Unclassified
ACD20_16493.43270.13G0037	MEL.A1_702	MEL.B1.003_125	MEL.B2.004_83	No hit		Unclassified
ACD20_16753.48943.14G0002	MEL.A1_8	MEL.B1.001_194	MEL.B2.003_320	Multiple	K00901	Multiple
ACD20_16753.48943.14G0003	MEL.A1_7	MEL.B1.001_195	MEL.B2.003_319	Multiple	K07042	Unclassified
ACD20_16753.48943.14G0004	MEL.A1_6	MEL.B1.001_196	MEL.B2.003_318	Firmicutes	K07037	Unclassified
ACD20_16753.48943.14G0005	MEL.A1_1610	MEL.B1.008_54	MEL.B2.002_478	Firmicutes	K09748	Unclassified
ACD20_16753.48943.14G0006	MEL.A1_1611	MEL.B1.008_53	MEL.B2.002_479	Firmicutes	K02600	Unclassified
ACD20_16753.48943.14G0007	MEL.A1_1505	MEL.B1.005_77	MEL.B2.002_265	Firmicutes	K07742	Unclassified
ACD20_16753.48943.14G0008	MEL.A1_1506	MEL.B1.005_78	MEL.B2.002_264	Firmicutes	K02519	Unclassified
ACD20_16753.48943.14G0009	MEL.A1_1509	MEL.B1.003_70	MEL.B2.002_263	Firmicutes	K02834	Unclassified
ACD20_16753.48943.14G0010	MEL.A1_1510	MEL.B1.003_69	MEL.B2.002_262	Cyanobacteria	K03177	Unclassified
ACD20_16753.48943.14G0011	MEL.A1_1511	MEL.B1.003_152	MEL.B2.002_261	No hit		Unclassified
ACD20_16753.48943.14G0012	MEL.A1_1512	MEL.B1.003_151	MEL.B2.002_260	Cyanobacteria		Unclassified
ACD20_16753.48943.14G0013	MEL.A1_1513	MEL.B1.003_150	MEL.B2.002_259	No hit		Unclassified
ACD20_16753.48943.14G0017	MEL.A1_723	MEL.B1.005_18	MEL.B2.009_7	Multiple	K03786	Metabolism
ACD20_16753.48943.14G0018	MEL.A1_687	MEL.B1.006_87	MEL.B2.001_178	Firmicutes	K02356	Unclassified
ACD20_16753.48943.14G0019	MEL.A1_686	MEL.B1.006_86	MEL.B2.001_179	Cyanobacteria	K02160	Metabolism
ACD20_16753.48943.14G0020	MEL.A1_685	MEL.B1.006_85	MEL.B2.001_181	Multiple	K01961	Metabolism
ACD20_16753.48943.14G0021	MEL.A1_1420	MEL.B1.005_188	MEL.B2.001_464	Actinobacteria		Unclassified
ACD20_16753.48943.14G0023	MEL.A1_108	MEL.B1.003_398	MEL.B2.001_193	Firmicutes	K03664	Unclassified
ACD20_16753.48943.14G0025	MEL.A1_1569	MEL.B1.007_5	MEL.B2.001_503	No hit		Unclassified
ACD20_16753.48943.14G0026	MEL.A1_1338	MEL.B1.002_128	MEL.B2.004_123	Multiple	K02469	Unclassified
ACD20_16753.48943.14G0027	MEL.A1_872	MEL.B1.006_74	MEL.B2.001_351	Multiple	K13038	Metabolism
ACD20_16753.48943.14G0028	MEL.A1_1535	MEL.B1.003_205	MEL.B2.002_474	Multiple	K01918	Metabolism
ACD20_16753.48943.14G0029	MEL.A1_1534	MEL.B1.003_206	MEL.B2.002_475	Firmicutes	K00606	Metabolism
ACD20_1690.37771.14G0001	MEL.A1_1533	MEL.B1.003_207	MEL.B2.002_476	Cyanobacteria		Unclassified
ACD20_1690.37771.14G0005	MEL.A1_972	MEL.B1.006_91	MEL.B2.004_160	No hit		Unclassified
ACD20_1690.37771.14G0012	MEL.A1_494	MEL.B1.002_127	MEL.B2.002_439	Multiple	K00053	Metabolism
ACD20_1690.37771.14G0014	MEL.A1_526	MEL.B1.004_90	MEL.B2.001_258	Multiple	K01652	Metabolism
ACD20_1690.37771.14G0016	MEL.A1_516	MEL.B1.007_54	MEL.B2.001_643	Euryarchaeota	K03769	Unclassified
ACD20_1690.37771.14G0024	MEL.A1_1499	MEL.B1.001_385	MEL.B2.001_194	Cyanobacteria	K01251	Metabolism
ACD20_1690.37771.14G0025	MEL.A1_1591	MEL.B1.005_196	MEL.B2.007_11	Multiple	K02405	Unclassified
ACD20_1690.37771.14G0028	MEL.A1_143	MEL.B1.008_59	MEL.B2.001_208	No hit		Unclassified
ACD20_1690.37771.14G0029	MEL.A1_1765	MEL.B1.003_181	MEL.B2.006_103	Multiple		Unclassified
ACD20_1690.37771.14G0031	MEL.A1_833	MEL.B1.002_125	MEL.B2.004_106	Proteobacteria		Unclassified
ACD20_17814.31984.15G0001	MEL.A1_1277	MEL.B1.004_118	MEL.B2.002_149	Firmicutes	K02528	Unclassified
ACD20_17814.31984.15G0002	MEL.A1_1276	MEL.B1.004_117	MEL.B2.003_127	Proteobacteria	K01919	Metabolism
ACD20_17814.31984.15G0014	MEL.A1_1656	MEL.B1.004_145	MEL.B2.003_55	Proteobacteria	K03474	Metabolism
ACD20_17814.31984.15G0015	MEL.A1_1044	MEL.B1.001_326	MEL.B2.004_161	No hit		Unclassified
ACD20_17814.31984.15G0018	MEL.A1_520	MEL.B1.003_127	MEL.B2.003_11	No hit		Unclassified
ACD20_17814.31984.15G0020	MEL.A1_1495	MEL.B1.001_104	MEL.B2.003_189	Multiple	K02959	Genetic Information Processing
ACD20_17814.31984.15G0026	MEL.A1_403	MEL.B1.010_10	MEL.B2.004_109	No hit		Unclassified
ACD20_17814.31984.15G0027	MEL.A1_1221	MEL.B1.003_178	MEL.B2.004_108	Multiple	K03742	Unclassified
ACD20_17814.31984.15G0028	MEL.A1_1310	MEL.B1.001_18	MEL.B2.006_78	Firmicutes		Unclassified
ACD20_17814.31984.15G0029	MEL.A1_32	MEL.B1.003_221	MEL.B2.002_177	Deferribacteres	K03321	Unclassified
ACD20_18280.45360.14G0004	MEL.A1_237	MEL.B1.004_333	MEL.B2.001_228	Firmicutes	K00872	Metabolism
ACD20_18280.45360.14G0005	MEL.A1_708	MEL.B1.003_380	MEL.B2.001_120	Thermodesulfobacteria	K07263	Unclassified
ACD20_18280.45360.14G0006	MEL.A1_1322	MEL.B1.007_47	MEL.B2.006_115	Multiple	K01756	Metabolism
ACD20_18280.45360.14G0008	MEL.A1_1093	MEL.B1.006_69	MEL.B2.001_233	Multiple	K02031	Environmental Information Processing
ACD20_18280.45360.14G0009	MEL.A1_1612	MEL.B1.001_233	MEL.B2.001_87	Multiple	K02358	Organismal Systems
ACD20_18280.45360.14G0010	MEL.A1_790	MEL.B1.005_38	MEL.B2.004_194	Multiple	K02946	Genetic Information Processing
ACD20_18280.45360.14G0011	MEL.A1_789	MEL.B1.005_39	MEL.B2.004_193	Cyanobacteria	K02906	Genetic Information Processing
ACD20_18280.45360.14G0012	MEL.A1_788	MEL.B1.005_40	MEL.B2.004_192	Cyanobacteria	K02926	Genetic Information Processing
ACD20_18280.45360.14G0013	MEL.A1_787	MEL.B1.005_41	MEL.B2.004_191	Firmicutes	K02892	Genetic Information Processing
ACD20_18280.45360.14G0014	MEL.A1_786	MEL.B1.005_42	MEL.B2.004_190	Firmicutes	K02886	Genetic Information Processing
ACD20_18280.45360.14G0015	MEL.A1_785	MEL.B1.005_43	MEL.B2.004_189	Cyanobacteria	K02965	Genetic Information Processing
ACD20_18280.45360.14G0016	MEL.A1_784	MEL.B1.005_44	MEL.B2.004_188	Multiple	K02890	Genetic Information Processing
ACD20_18280.45360.14G0017	MEL.A1_783	MEL.B1.005_45	MEL.B2.004_187	Firmicutes	K02982	Genetic Information Processing
ACD20_18280.45360.14G0018	MEL.A1_782	MEL.B1.005_46	MEL.B2.004_186	Firmicutes	K02878	Genetic Information Processing
ACD20_18280.45360.14G0019	MEL.A1_781	MEL.B1.005_47	MEL.B2.004_185	No hit		Unclassified
ACD20_18280.45360.14G0020	MEL.A1_780	MEL.B1.005_48	MEL.B2.004_184	Multiple	K02961	Genetic Information Processing
ACD20_18280.45360.14G0021	MEL.A1_779	MEL.B1.005_49	MEL.B2.004_183	Multiple	K02874	Genetic Information Processing
ACD20_18280.45360.14G0022	MEL.A1_778	MEL.B1.005_50	MEL.B2.004_182	Firmicutes	K02895	Genetic Information Processing
ACD20_18280.45360.14G0023	MEL.A1_777	MEL.B1.005_51	MEL.B2.004_181	Firmicutes	K02931	Genetic Information Processing
ACD20_18280.45360.14G0024	MEL.A1_776	MEL.B1.005_52	MEL.B2.004_180	Cyanobacteria	K02954	Genetic Information Processing
ACD20_18280.45360.14G0025	MEL.A1_775	MEL.B1.005_59	MEL.B2.004_179	Firmicutes	K02994	Genetic Information Processing
ACD20_18280.45360.14G0026	MEL.A1_774	MEL.B1.005_58	MEL.B2.004_178	Multiple	K02933	Genetic Information Processing
ACD20_18280.45360.14G0027	MEL.A1_773	MEL.B1.005_57	MEL.B2.004_177	Multiple	K02881	Genetic Information Processing
ACD20_18280.45360.14G0029	MEL.A1_1043	MEL.B1.001_353	MEL.B2.006_135	No hit		Unclassified
ACD20_18280.45360.14G0033	MEL.A1_260	MEL.B1.003_74	MEL.B2.001_298	Firmicutes	K03086	Unclassified
ACD20_18280.45360.14G0037	MEL.A1_1487	MEL.B1.006_104	MEL.B2.009_5	Deinococcus-Thermus	K02027	Unclassified
ACD20_18280.45360.14G0039	MEL.A1_1727	MEL.B1.001_230	MEL.B2.001_148	Firmicutes		Unclassified
ACD20_18280.45360.14G0040	MEL.A1_1721	MEL.B1.003_58	MEL.B2.009_8	Cyanobacteria	K08999	Unclassified
ACD20_18280.45360.14G0042	MEL.A1_1432	MEL.B1.001_144	MEL.B2.001_238	Multiple	K01006	Metabolism
ACD20_18280.45360.14G0043	MEL.A1_1773	MEL.B1.005_121	MEL.B2.001_466	Firmicutes	K01628	Metabolism
ACD20_18461.24404.14G0003	MEL.A1_1135	MEL.B1.005_64	MEL.B2.001_456	Multiple	K01689	Multiple
ACD20_18461.24404.14G0004	MEL.A1_1595	MEL.B1.005_184	MEL.B2.004_110	Firmicutes		Unclassified
ACD20_18461.24404.14G0006	MEL.A1_1558	MEL.B1.001_224	MEL.B2.004_44	Multiple	K00796	Metabolism
ACD20_18461.24404.14G0009	MEL.A1_238	MEL.B1.007_6	MEL.B2.002_445	Cyanobacteria		Unclassified
ACD20_18461.24404.14G0020	MEL.A1_714	MEL.B1.001_478	MEL.B2.001_280	Cyanobacteria	K02669	Unclassified
ACD20_19052.35760.14G0011	MEL.A1_1349	MEL.B1.003_31	MEL.B2.003_210	Thermodesulfobacteria	K01897	Multiple
ACD20_19052.35760.14G0012	MEL.A1_913	MEL.B1.003_346	MEL.B2.004_164	No hit		Unclassified
ACD20_19052.35760.14G0013	MEL.A1_914	MEL.B1.003_345	MEL.B2.004_163	No hit		Unclassified
ACD20_19052.35760.14G0015	MEL.A1_186	MEL.B1.004_171	MEL.B2.001_144	Actinobacteria	K11175	Metabolism
ACD20_19052.35760.14G0024	MEL.A1_754	MEL.B1.004_266	MEL.B2.003_132	Firmicutes		Unclassified
ACD20_19052.35760.14G0025	MEL.A1_1676	MEL.B1.003_401	MEL.B2.004_56	Multiple	K09767	Unclassified
ACD20_19052.35760.14G0027	MEL.A1_405	MEL.B1.002_23	MEL.B2.004_157	Cyanobacteria	K12600	Genetic Information Processing
ACD20_19052.35760.14G0028	MEL.A1_335	MEL.B1.008_60	MEL.B2.003_177	No hit		Unclassified
ACD20_19052.35760.14G0029	MEL.A1_334	MEL.B1.008_61	MEL.B2.003_178	Cyanobacteria	K12600	Unclassified
ACD20_19052.35760.14G0030	MEL.A1_1250	MEL.B1.001_235	MEL.B2.003_227	Firmicutes	K02963	Genetic Information Processing
ACD20_19052.35760.14G0031	MEL.A1_1251	MEL.B1.001_236	MEL.B2.003_226	Firmicutes		Unclassified
ACD20_19052.35760.14G0032	MEL.A1_1252	MEL.B1.001_237	MEL.B2.003_225	Firmicutes	K02990	Genetic Information Processing
ACD20_19052.35760.14G0033	MEL.A1_1253	MEL.B1.003_82	MEL.B2.001_232	Firmicutes	K01778	Metabolism
ACD20_19052.35760.14G0036	MEL.A1_932	MEL.B1.001_81	MEL.B2.003_107	No hit		Unclassified
ACD20_19052.35760.14G0037	MEL.A1_15	MEL.B1.007_33	MEL.B2.001_469	Firmicutes		Unclassified
ACD20_1947.23987.15G0002	MEL.A1_611	MEL.B1.003_67	MEL.B2.001_544	Firmicutes	K06287	Unclassified
ACD20_1947.23987.15G0003	MEL.A1_746	MEL.B1.003_68	MEL.B2.012_8	Actinobacteria	K02945	Genetic Information Processing
ACD20_1947.23987.15G0004	MEL.A1_1804	MEL.B1.001_86	MEL.B2.002_258	Firmicutes	K03086	Genetic Information Processing
ACD20_1947.23987.15G0005	MEL.A1_1542	MEL.B1.004_321	MEL.B2.002_268	Firmicutes	K03657	Genetic Information Processing
ACD20_1947.23987.15G0007	MEL.A1_1541	MEL.B1.007_75	MEL.B2.002_269	No hit		Unclassified
ACD20_1947.23987.15G0013	MEL.A1_42	MEL.B1.007_119	MEL.B2.001_224	Proteobacteria		Unclassified
ACD20_1962.42504.14G0003	MEL.A1_60	MEL.B1.003_241	MEL.B2.008_42	Euryarchaeota		Unclassified
ACD20_1962.42504.14G0004	MEL.A1_748	MEL.B1.002_55	MEL.B2.001_318	Firmicutes	K01873	Multiple
ACD20_1962.42504.14G0005	MEL.A1_480	MEL.B1.006_27	MEL.B2.001_109	Firmicutes	K11754	Metabolism
ACD20_1962.42504.14G0006	MEL.A1_264	MEL.B1.007_32	MEL.B2.001_110	Cyanobacteria		Unclassified
ACD20_1962.42504.14G0013	MEL.A1_1051	MEL.B1.007_99	MEL.B2.002_294	Proteobacteria		Unclassified
ACD20_1962.42504.14G0014	MEL.A1_886	MEL.B1.003_250	MEL.B2.003_330	Firmicutes	K01890	Genetic Information Processing
ACD20_1962.42504.14G0016	MEL.A1_1555	MEL.B1.005_197	MEL.B2.001_139	Multiple	K01889	Genetic Information Processing
ACD20_1962.42504.14G0018	MEL.A1_1554	MEL.B1.001_375	MEL.B2.001_118	Firmicutes		Unclassified
ACD20_1962.42504.14G0019	MEL.A1_1304	MEL.B1.008_77	MEL.B2.001_137	Firmicutes	K00099	Metabolism
ACD20_1962.42504.14G0025	MEL.A1_150	MEL.B1.009_10	MEL.B2.003_128	Multiple	K01920	Metabolism
ACD20_1962.42504.14G0031	MEL.A1_577	MEL.B1.010_13	MEL.B2.001_288	Firmicutes		Unclassified
ACD20_1962.42504.14G0034	MEL.A1_669	MEL.B1.008_28	MEL.B2.001_630	Bacteroidetes	K06966	Unclassified
ACD20_1962.42504.14G0037	MEL.A1_883	MEL.B1.004_301	MEL.B2.004_98	Acidobacteria		Unclassified
ACD20_20398.28785.13G0001	MEL.A1_1357	MEL.B1.009_5	MEL.B2.001_566	No hit		Unclassified
ACD20_20398.28785.13G0003	MEL.A1_1521	MEL.B1.006_70	MEL.B2.002_357	Multiple	K01783	Metabolism
ACD20_20398.28785.13G0004	MEL.A1_1520	MEL.B1.003_117	MEL.B2.002_358	Multiple	K03685	Genetic Information Processing
ACD20_20398.28785.13G0005	MEL.A1_1519	MEL.B1.003_116	MEL.B2.002_359	Cyanobacteria	K00981	Multiple
ACD20_20398.28785.13G0006	MEL.A1_1518	MEL.B1.003_115	MEL.B2.002_360	Firmicutes	K02838	Unclassified
ACD20_20398.28785.13G0007	MEL.A1_1517	MEL.B1.003_114	MEL.B2.002_361	Firmicutes	K09903	Metabolism
ACD20_20398.28785.13G0008	MEL.A1_26	MEL.B1.008_72	MEL.B2.002_377	No hit		Unclassified
ACD20_20398.28785.13G0009	MEL.A1_27	MEL.B1.003_189	MEL.B2.002_376	No hit		Unclassified
ACD20_20398.28785.13G0011	MEL.A1_1285	MEL.B1.004_99	MEL.B2.001_96	No hit		Unclassified
ACD20_20398.28785.13G0013	MEL.A1_1447	MEL.B1.007_46	MEL.B2.001_88	No hit		Unclassified
ACD20_20398.28785.13G0014	MEL.A1_1056	MEL.B1.003_113	MEL.B2.003_308	No hit		Unclassified
ACD20_20398.28785.13G0015	MEL.A1_1596	MEL.B1.003_334	MEL.B2.007_43	Proteobacteria	K02392	Unclassified
ACD20_20398.28785.13G0016	MEL.A1_1597	MEL.B1.003_333	MEL.B2.007_44	Proteobacteria	K02392	Cellular Processes
ACD20_20398.28785.13G0017	MEL.A1_1598	MEL.B1.003_332	MEL.B2.007_45	No hit		Unclassified
ACD20_20398.28785.13G0018	MEL.A1_1599	MEL.B1.003_331	MEL.B2.007_46	Firmicutes	K02388	Cellular Processes
ACD20_20398.28785.13G0019	MEL.A1_424	MEL.B1.008_38	MEL.B2.007_47	Firmicutes		Unclassified
ACD20_20398.28785.13G0020	MEL.A1_735	MEL.B1.001_215	MEL.B2.007_48	No hit		Unclassified
ACD20_20398.28785.13G0021	MEL.A1_734	MEL.B1.001_214	MEL.B2.001_511	Proteobacteria	K02409	Cellular Processes
ACD20_20398.28785.13G0022	MEL.A1_733	MEL.B1.001_251	MEL.B2.001_512	No hit		Unclassified
ACD20_20398.28785.13G0023	MEL.A1_732	MEL.B1.001_250	MEL.B2.001_513	Firmicutes	K02411	Cellular Processes
ACD20_20398.28785.13G0024	MEL.A1_731	MEL.B1.001_249	MEL.B2.001_514	Multiple	K02400	Unclassified
ACD20_20398.28785.13G0025	MEL.A1_1486	MEL.B1.007_105	MEL.B2.001_515	Multiple	K02412	Cellular Processes
ACD20_20398.28785.13G0026	MEL.A1_23	MEL.B1.003_236	MEL.B2.001_371	No hit		Unclassified
ACD20_20398.28785.13G0027	MEL.A1_24	MEL.B1.003_237	MEL.B2.001_370	No hit		Unclassified
ACD20_20398.28785.13G0028	MEL.A1_25	MEL.B1.003_238	MEL.B2.001_369	Firmicutes	K02390	Cellular Processes
ACD20_20398.28785.13G0030	MEL.A1_1356	MEL.B1.001_181	MEL.B2.006_17	Cyanobacteria		Unclassified
ACD20_20398.28785.13G0031	MEL.A1_868	MEL.B1.002_106	MEL.B2.004_58	Multiple	K03671	Unclassified
ACD20_20526.123248.14G0017	MEL.A1_67	MEL.B1.001_20	MEL.B2.003_219	Cyanobacteria		Unclassified
ACD20_20526.123248.14G0044	MEL.A1_1364	MEL.B1.005_228	MEL.B2.004_87	Thermotogae	K01866	Genetic Information Processing
ACD20_20526.123248.14G0054	MEL.A1_63	MEL.B1.004_268	MEL.B2.002_112	Nitrospirae	K09922	Unclassified
ACD20_20526.123248.14G0078	MEL.A1_1334	MEL.B1.005_55	MEL.B2.003_34	Cyanobacteria		Unclassified
ACD20_20526.123248.14G0079	MEL.A1_1335	MEL.B1.005_54	MEL.B2.003_33	No hit		Unclassified
ACD20_20526.123248.14G0080	MEL.A1_1759	MEL.B1.006_111	MEL.B2.006_97	Chloroflexi	K03526	Metabolism
ACD20_20526.123248.14G0081	MEL.A1_999	MEL.B1.005_98	MEL.B2.002_283	Bacteroidetes	K01520	Metabolism
ACD20_20526.123248.14G0084	MEL.A1_380	MEL.B1.003_240	MEL.B2.003_310	No hit		Unclassified
ACD20_20526.123248.14G0087	MEL.A1_266	MEL.B1.001_462	MEL.B2.001_245	Firmicutes	K01878	Genetic Information Processing
ACD20_20526.123248.14G0088	MEL.A1_772	MEL.B1.007_15	MEL.B2.001_521	Firmicutes	K05516	Unclassified
ACD20_20526.123248.14G0089	MEL.A1_591	MEL.B1.004_279	MEL.B2.001_484	Firmicutes		Unclassified
ACD20_20526.123248.14G0091	MEL.A1_557	MEL.B1.005_35	MEL.B2.001_177	Multiple	K00950	Metabolism
ACD20_20526.123248.14G0093	MEL.A1_556	MEL.B1.005_34	MEL.B2.001_176	Firmicutes	K07007	Unclassified
ACD20_20526.123248.14G0094	MEL.A1_174	MEL.B1.001_168	MEL.B2.003_46	Cyanobacteria	K02115	Metabolism
ACD20_20526.123248.14G0095	MEL.A1_175	MEL.B1.001_170	MEL.B2.003_47	Multiple	K02111	Metabolism
ACD20_20526.123248.14G0096	MEL.A1_176	MEL.B1.001_171	MEL.B2.003_48	Firmicutes	K02113	Metabolism
ACD20_20526.123248.14G0097	MEL.A1_177	MEL.B1.001_172	MEL.B2.003_49	No hit		Unclassified
ACD20_20526.123248.14G0098	MEL.A1_178	MEL.B1.001_173	MEL.B2.003_50	Firmicutes	K02109	Metabolism
ACD20_20526.123248.14G0099	MEL.A1_179	MEL.B1.001_174	MEL.B2.003_51	No hit		Unclassified
ACD20_20526.123248.14G0100	MEL.A1_180	MEL.B1.001_175	MEL.B2.003_52	Cyanobacteria	K02108	Metabolism
ACD20_20526.123248.14G0103	MEL.A1_361	MEL.B1.008_65	MEL.B2.003_170	Multiple		Unclassified
ACD20_20526.123248.14G0105	MEL.A1_906	MEL.B1.010_2	MEL.B2.006_58	Cyanobacteria	K03100	Genetic Information Processing
ACD20_20526.123248.14G0106	MEL.A1_698	MEL.B1.005_9	MEL.B2.001_402	Multiple	K07106	Metabolism
ACD20_20526.123248.14G0107	MEL.A1_435	MEL.B1.001_88	MEL.B2.002_363	Multiple	K00962	Multiple
ACD20_20526.123248.14G0110	MEL.A1_1042	MEL.B1.002_29	MEL.B2.002_481	Multiple	K08303	Human Diseases
ACD20_20526.123248.14G0113	MEL.A1_378	MEL.B1.002_42	MEL.B2.003_292	Multiple	K03686	Unclassified
ACD20_20526.123248.14G0114	MEL.A1_377	MEL.B1.002_43	MEL.B2.003_291	Firmicutes		Unclassified
ACD20_20823.17508.14G0002	MEL.A1_402	MEL.B1.003_16	MEL.B2.002_245	Cyanobacteria		Unclassified
ACD20_20823.17508.14G0004	MEL.A1_1619	MEL.B1.003_356	MEL.B2.004_13	Multiple	K01934	Metabolism
ACD20_24714.10868.14G0013	MEL.A1_721	MEL.B1.001_103	MEL.B2.001_123	No hit		Unclassified
ACD20_25173.41887.13G0002	MEL.A1_837	MEL.B1.009_9	MEL.B2.002_489	No hit		Unclassified
ACD20_25173.41887.13G0004	MEL.A1_453	MEL.B1.001_491	MEL.B2.004_91	Aquificae	K10773	Genetic Information Processing
ACD20_25173.41887.13G0005	MEL.A1_336	MEL.B1.007_117	MEL.B2.007_52	Firmicutes		Unclassified
ACD20_25173.41887.13G0017	MEL.A1_239	MEL.B1.007_7	MEL.B2.002_444	Firmicutes		Unclassified
ACD20_25173.41887.13G0023	MEL.A1_1045	MEL.B1.002_131	MEL.B2.002_333	No hit		Unclassified
ACD20_25173.41887.13G0027	MEL.A1_891	MEL.B1.007_30	MEL.B2.008_9	Multiple	K01491	Metabolism
ACD20_25173.41887.13G0028	MEL.A1_890	MEL.B1.007_31	MEL.B2.008_10	Euryarchaeota	K07321	Unclassified
ACD20_25173.41887.13G0030	MEL.A1_974	MEL.B1.009_1	MEL.B2.001_637	No hit		Unclassified
ACD20_26210.20783.14G0001	MEL.A1_272	MEL.B1.003_274	MEL.B2.002_281	Multiple		Unclassified
ACD20_26210.20783.14G0004	MEL.A1_1238	MEL.B1.003_312	MEL.B2.001_358	Cyanobacteria		Unclassified
ACD20_26210.20783.14G0005	MEL.A1_1237	MEL.B1.003_311	MEL.B2.001_359	Cyanobacteria		Unclassified
ACD20_26210.20783.14G0008	MEL.A1_457	MEL.B1.001_14	MEL.B2.001_78	Thermodesulfobacteria	K07263	Unclassified
ACD20_26210.20783.14G0010	MEL.A1_192	MEL.B1.003_257	MEL.B2.001_610	No hit		Unclassified
ACD20_26210.20783.14G0011	MEL.A1_193	MEL.B1.003_258	MEL.B2.001_611	Cyanobacteria	K03088	Genetic Information Processing
ACD20_26279.54254.14G0002	MEL.A1_138	MEL.B1.002_22	MEL.B2.006_43	Firmicutes	K00283	Metabolism
ACD20_26279.54254.14G0003	MEL.A1_769	MEL.B1.007_18	MEL.B2.002_356	Multiple	K00282	Metabolism
ACD20_26279.54254.14G0004	MEL.A1_770	MEL.B1.007_17	MEL.B2.002_355	Firmicutes	K02437	Unclassified
ACD20_26279.54254.14G0005	MEL.A1_771	MEL.B1.007_16	MEL.B2.002_354	Multiple	K00605	Metabolism
ACD20_26279.54254.14G0007	MEL.A1_96	MEL.B1.010_8	MEL.B2.001_355	Multiple	K03551	Genetic Information Processing
ACD20_26279.54254.14G0009	MEL.A1_1267	MEL.B1.001_207	MEL.B2.003_329	No hit		Unclassified
ACD20_26279.54254.14G0011	MEL.A1_262	MEL.B1.003_17	MEL.B2.002_290	Firmicutes	K03631	Unclassified
ACD20_26279.54254.14G0012	MEL.A1_827	MEL.B1.003_57	MEL.B2.002_291	Multiple	K00858	Metabolism
ACD20_26279.54254.14G0013	MEL.A1_90	MEL.B1.007_73	MEL.B2.001_83	Firmicutes	K06442	Unclassified
ACD20_26279.54254.14G0016	MEL.A1_21	MEL.B1.001_242	MEL.B2.004_102	Multiple	K01191	Metabolism
ACD20_26279.54254.14G0017	MEL.A1_235	MEL.B1.002_114	MEL.B2.002_308	Firmicutes		Unclassified
ACD20_26279.54254.14G0023	MEL.A1_540	MEL.B1.001_300	MEL.B2.002_351	Proteobacteria	K01081	Metabolism
ACD20_26279.54254.14G0024	MEL.A1_704	MEL.B1.008_42	MEL.B2.001_587	Cyanobacteria	K03046	Multiple
ACD20_26279.54254.14G0025	MEL.A1_705	MEL.B1.008_41	MEL.B2.001_586	Cyanobacteria	K03046	Unclassified
ACD20_26279.54254.14G0026	MEL.A1_706	MEL.B1.008_40	MEL.B2.001_585	Cyanobacteria	K03043	Multiple
ACD20_26279.54254.14G0027	MEL.A1_1538	MEL.B1.001_8	MEL.B2.001_529	Multiple	K02935	Genetic Information Processing
ACD20_26279.54254.14G0028	MEL.A1_1537	MEL.B1.001_9	MEL.B2.001_530	Firmicutes	K02864	Genetic Information Processing
ACD20_26279.54254.14G0032	MEL.A1_41	MEL.B1.007_120	MEL.B2.001_223	Cyanobacteria		Unclassified
ACD20_26279.54254.14G0033	MEL.A1_1550	MEL.B1.007_57	MEL.B2.002_338	Firmicutes	K02863	Genetic Information Processing
ACD20_26279.54254.14G0034	MEL.A1_1549	MEL.B1.007_58	MEL.B2.002_337	Cyanobacteria	K02867	Genetic Information Processing
ACD20_26279.54254.14G0035	MEL.A1_1548	MEL.B1.007_59	MEL.B2.002_336	Firmicutes	K02601	Unclassified
ACD20_26279.54254.14G0036	MEL.A1_1547	MEL.B1.007_60	MEL.B2.002_335	No hit		Unclassified
ACD20_26279.54254.14G0037	MEL.A1_595	MEL.B1.001_213	MEL.B2.002_331	Multiple	K00800	Metabolism
ACD20_26563.5896.13G0002	MEL.A1_1462	MEL.B1.001_146	MEL.B2.004_148	Firmicutes	K02400	Cellular Processes
ACD20_26563.5896.13G0003	MEL.A1_134	MEL.B1.004_50	MEL.B2.004_76	Cyanobacteria	K02026	Unclassified
ACD20_26563.5896.13G0004	MEL.A1_135	MEL.B1.006_20	MEL.B2.004_75	Cyanobacteria	K02025	Unclassified
ACD20_26563.5896.13G0005	MEL.A1_1492	MEL.B1.007_109	MEL.B2.003_134	No hit		Unclassified
ACD20_26723.8006.14G0003	MEL.A1_1165	MEL.B1.006_25	MEL.B2.001_479	Euryarchaeota	K01151	Genetic Information Processing
ACD20_26723.8006.14G0004	MEL.A1_1386	MEL.B1.006_82	MEL.B2.001_601	No hit		Unclassified
ACD20_26723.8006.14G0005	MEL.A1_1387	MEL.B1.006_81	MEL.B2.001_600	No hit		Unclassified
ACD20_26723.8006.14G0006	MEL.A1_1388	MEL.B1.006_80	MEL.B2.001_599	Proteobacteria	K02419	Cellular Processes
ACD20_26723.8006.14G0007	MEL.A1_1389	MEL.B1.006_79	MEL.B2.001_598	No hit	K02420	Cellular Processes
ACD20_26723.8006.14G0009	MEL.A1_1390	MEL.B1.006_77	MEL.B2.001_596	Firmicutes	K02421	Cellular Processes
ACD20_26723.8006.14G0011	MEL.A1_1566	MEL.B1.001_197	MEL.B2.008_37	No hit		Unclassified
ACD20_2753.17987.14G0002	MEL.A1_140	MEL.B1.004_179	MEL.B2.003_314	No hit		Unclassified
ACD20_2753.17987.14G0003	MEL.A1_141	MEL.B1.003_197	MEL.B2.003_313	Firmicutes	K00791	Metabolism
ACD20_2753.17987.14G0004	MEL.A1_285	MEL.B1.004_246	MEL.B2.008_4	Multiple	K03495	Unclassified
ACD20_2753.17987.14G0009	MEL.A1_1378	MEL.B1.007_70	MEL.B2.001_604	Cyanobacteria		Unclassified
ACD20_2753.17987.14G0010	MEL.A1_1377	MEL.B1.007_69	MEL.B2.001_605	Cyanobacteria		Unclassified
ACD20_2753.17987.14G0011	MEL.A1_1376	MEL.B1.007_68	MEL.B2.001_606	Cyanobacteria		Unclassified
ACD20_2753.17987.14G0012	MEL.A1_810	MEL.B1.002_134	MEL.B2.003_333	Cyanobacteria		Unclassified
ACD20_2753.17987.14G0014	MEL.A1_218	MEL.B1.003_309	MEL.B2.004_72	Proteobacteria		Unclassified
ACD20_2753.17987.14G0015	MEL.A1_219	MEL.B1.003_308	MEL.B2.004_73	Cyanobacteria		Unclassified
ACD20_2753.17987.14G0016	MEL.A1_220	MEL.B1.003_307	MEL.B2.004_74	No hit		Unclassified
ACD20_2792.21729.15G0002	MEL.A1_1807	MEL.B1.004_174	MEL.B2.006_62	Streptophyta		Unclassified
ACD20_28221.28996.14G0004	MEL.A1_459	MEL.B1.001_33	MEL.B2.003_212	Firmicutes	K00134	Multiple
ACD20_28221.28996.14G0005	MEL.A1_1041	MEL.B1.003_121	MEL.B2.001_89	Multiple	K01803	Metabolism
ACD20_28221.28996.14G0006	MEL.A1_919	MEL.B1.005_238	MEL.B2.006_45	Multiple		Unclassified
ACD20_28221.28996.14G0007	MEL.A1_1568	MEL.B1.007_4	MEL.B2.002_219	Cyanobacteria	K03797	Unclassified
ACD20_28221.28996.14G0010	MEL.A1_1490	MEL.B1.005_255	MEL.B2.002_218	Cyanobacteria	K10697	Environmental Information Processing
ACD20_28221.28996.14G0017	MEL.A1_1059	MEL.B1.001_43	MEL.B2.002_256	Bacteroidetes		Unclassified
ACD20_28221.28996.14G0018	MEL.A1_1086	MEL.B1.001_44	MEL.B2.002_257	Firmicutes		Unclassified
ACD20_28221.28996.14G0020	MEL.A1_1085	MEL.B1.004_75	MEL.B2.003_42	Euryarchaeota		Unclassified
ACD20_28221.28996.14G0021	MEL.A1_1084	MEL.B1.004_76	MEL.B2.003_41	Cyanobacteria	K10697	Unclassified
ACD20_28221.28996.14G0022	MEL.A1_1771	MEL.B1.005_119	MEL.B2.001_287	Cyanobacteria		Unclassified
ACD20_28221.28996.14G0023	MEL.A1_1772	MEL.B1.005_120	MEL.B2.001_286	No hit		Unclassified
ACD20_28221.28996.14G0024	MEL.A1_115	MEL.B1.006_32	MEL.B2.001_285	Multiple	K01963	Metabolism
ACD20_28221.28996.14G0025	MEL.A1_116	MEL.B1.006_33	MEL.B2.001_284	Multiple	K01962	Metabolism
ACD20_28221.28996.14G0026	MEL.A1_117	MEL.B1.006_37	MEL.B2.001_283	Firmicutes	K02687	Unclassified
ACD20_29020.6314.13G0002	MEL.A1_196	MEL.B1.009_23	MEL.B2.001_206	Elusimicrobia	K01655	K02594
ACD20_29020.6314.13G0003	MEL.A1_194	MEL.B1.001_82	MEL.B2.005_99	Elusimicrobia	K01703	Metabolism
ACD20_29020.6314.13G0004	MEL.A1_232	MEL.B1.004_25	MEL.B2.004_176	Elusimicrobia	K01704	Metabolism
ACD20_29020.6314.13G0005	MEL.A1_341	MEL.B1.005_173	MEL.B2.004_107	Multiple	K00030	Metabolism
ACD20_2903.30796.14G0007	MEL.A1_1123	MEL.B1.006_90	MEL.B2.001_365	Multiple	K01486	Metabolism
ACD20_29089.28969.14G0003	MEL.A1_560	MEL.B1.004_104	MEL.B2.003_174	Cyanobacteria		Unclassified
ACD20_29089.28969.14G0009	MEL.A1_284	MEL.B1.001_216	MEL.B2.001_361	Proteobacteria		Unclassified
ACD20_29089.28969.14G0015	MEL.A1_1258	MEL.B1.004_158	MEL.B2.002_151	Firmicutes		Unclassified
ACD20_29089.28969.14G0020	MEL.A1_1806	MEL.B1.005_20	MEL.B2.002_371	Firmicutes	K09007	Unclassified
ACD20_29089.28969.14G0023	MEL.A1_358	MEL.B1.002_61	MEL.B2.003_311	Cyanobacteria	K03696	Unclassified
ACD20_29089.28969.14G0024	MEL.A1_1497	MEL.B1.001_341	MEL.B2.002_139	Multiple	K06942	Unclassified
ACD20_29089.28969.14G0026	MEL.A1_1022	MEL.B1.001_472	MEL.B2.002_318	Proteobacteria		Unclassified
ACD20_29089.28969.14G0027	MEL.A1_30	MEL.B1.005_209	MEL.B2.003_331	Firmicutes	K02401	Cellular Processes
ACD20_29089.28969.14G0028	MEL.A1_29	MEL.B1.005_208	MEL.B2.003_332	Bacteroidetes	K02405	Multiple
ACD20_30262.18687.14G0002	MEL.A1_1213	MEL.B1.004_97	MEL.B2.008_57	Not enough hits		Unclassified
ACD20_30262.18687.14G0004	MEL.A1_468	MEL.B1.001_155	MEL.B2.002_254	No hit		Unclassified
ACD20_30262.18687.14G0005	MEL.A1_980	MEL.B1.003_172	MEL.B2.001_63	No hit		Unclassified
ACD20_30262.18687.14G0008	MEL.A1_1561	MEL.B1.003_399	MEL.B2.001_61	Proteobacteria	K07139	Unclassified
ACD20_30262.18687.14G0009	MEL.A1_671	MEL.B1.001_156	MEL.B2.003_175	Cyanobacteria	K00759	Metabolism
ACD20_30262.18687.14G0014	MEL.A1_500	MEL.B1.002_34	MEL.B2.006_55	Proteobacteria		Unclassified
ACD20_303.15031.13G0001	MEL.A1_915	MEL.B1.001_403	MEL.B2.004_32	Multiple		Unclassified
ACD20_303.15031.13G0002	MEL.A1_419	MEL.B1.005_249	MEL.B2.002_198	Proteobacteria	K07107	Unclassified
ACD20_303.15031.13G0004	MEL.A1_1437	MEL.B1.003_388	MEL.B2.001_155	Firmicutes		Unclassified
ACD20_303.15031.13G0009	MEL.A1_893	MEL.B1.001_331	MEL.B2.003_149	Firmicutes	K02996	Genetic Information Processing
ACD20_303.15031.13G0010	MEL.A1_894	MEL.B1.001_332	MEL.B2.003_150	Firmicutes	K02871	Genetic Information Processing
ACD20_303.15031.13G0011	MEL.A1_895	MEL.B1.001_333	MEL.B2.003_151	Firmicutes	K06173	Unclassified
ACD20_303.15031.13G0012	MEL.A1_896	MEL.B1.001_334	MEL.B2.003_152	Cyanobacteria	K02879	Genetic Information Processing
ACD20_303.15031.13G0013	MEL.A1_897	MEL.B1.001_335	MEL.B2.003_153	Multiple	K03040	Multiple
ACD20_303.15031.13G0014	MEL.A1_898	MEL.B1.001_336	MEL.B2.003_154	Chloroflexi	K02986	Genetic Information Processing
ACD20_303.15031.13G0015	MEL.A1_899	MEL.B1.001_337	MEL.B2.003_155	Multiple	K02948	Genetic Information Processing
ACD20_303.15031.13G0016	MEL.A1_900	MEL.B1.001_338	MEL.B2.003_156	Actinobacteria	K02952	Genetic Information Processing
ACD20_303.15031.13G0017	MEL.A1_901	MEL.B1.001_339	MEL.B2.003_157	No hit	K02919	Genetic Information Processing
ACD20_303.15031.13G0018	MEL.A1_902	MEL.B1.001_340	MEL.B2.003_158	Firmicutes	K02518	Unclassified
ACD20_30338.20765.14G0005	MEL.A1_836	MEL.B1.009_6	MEL.B2.002_492	No hit		Unclassified
ACD20_30338.20765.14G0006	MEL.A1_1488	MEL.B1.006_105	MEL.B2.009_6	No hit		Unclassified
ACD20_30338.20765.14G0008	MEL.A1_1383	MEL.B1.008_37	MEL.B2.001_459	No hit		Unclassified
ACD20_30338.20765.14G0014	MEL.A1_1278	MEL.B1.004_136	MEL.B2.002_148	Firmicutes	K00919	Metabolism
ACD20_30338.20765.14G0015	MEL.A1_1630	MEL.B1.007_23	MEL.B2.002_302	No hit		Unclassified
ACD20_30338.20765.14G0016	MEL.A1_1631	MEL.B1.007_24	MEL.B2.002_301	Firmicutes	K09139	Unclassified
ACD20_3083.45613.14G0013	MEL.A1_1667	MEL.B1.008_23	MEL.B2.001_150	Firmicutes	K01869	Multiple
ACD20_3083.45613.14G0014	MEL.A1_149	MEL.B1.004_35	MEL.B2.001_563	Not enough hits		Unclassified
ACD20_3083.45613.14G0017	MEL.A1_263	MEL.B1.001_457	MEL.B2.003_131	No hit		Unclassified
ACD20_3083.45613.14G0023	MEL.A1_333	MEL.B1.008_62	MEL.B2.001_380	Cyanobacteria	K09710	Unclassified
ACD20_3083.45613.14G0024	MEL.A1_1409	MEL.B1.001_6	MEL.B2.001_497	Multiple		Unclassified
ACD20_3083.45613.14G0025	MEL.A1_1410	MEL.B1.001_5	MEL.B2.001_498	Multiple	K06861	Environmental Information Processing
ACD20_3083.45613.14G0026	MEL.A1_616	MEL.B1.003_372	MEL.B2.006_37	No hit		Unclassified
ACD20_3083.45613.14G0027	MEL.A1_615	MEL.B1.003_371	MEL.B2.006_38	Firmicutes		Unclassified
ACD20_3083.45613.14G0028	MEL.A1_1306	MEL.B1.004_28	MEL.B2.006_101	Multiple	K03644	Metabolism
ACD20_3083.45613.14G0029	MEL.A1_1308	MEL.B1.001_192	MEL.B2.006_102	Nitrospirae	K00382	Metabolism
ACD20_3083.45613.14G0032	MEL.A1_282	MEL.B1.005_36	MEL.B2.008_31	Firmicutes	K02909	Genetic Information Processing
ACD20_3083.45613.14G0033	MEL.A1_281	MEL.B1.003_23	MEL.B2.008_3	Firmicutes	K03465	Metabolism
ACD20_3083.45613.14G0034	MEL.A1_1504	MEL.B1.005_76	MEL.B2.001_463	Cyanobacteria	K02835	Unclassified
ACD20_3083.45613.14G0035	MEL.A1_1155	MEL.B1.003_46	MEL.B2.002_92	Multiple	K02493	Unclassified
ACD20_3083.45613.14G0039	MEL.A1_608	MEL.B1.004_304	MEL.B2.002_278	Proteobacteria		Unclassified
ACD20_3188.9497.15G0001	MEL.A1_1087	MEL.B1.003_180	MEL.B2.002_378	Proteobacteria		Unclassified
ACD20_3188.9497.15G0003	MEL.A1_1052	MEL.B1.003_367	MEL.B2.002_379	Cyanobacteria	K01467	Multiple
ACD20_3188.9497.15G0007	MEL.A1_1608	MEL.B1.001_455	MEL.B2.001_505	Multiple	K02967	Genetic Information Processing
ACD20_3188.9497.15G0008	MEL.A1_1607	MEL.B1.001_454	MEL.B2.001_504	Firmicutes	K02357	Unclassified
ACD20_3188.9497.15G0009	MEL.A1_240	MEL.B1.004_341	MEL.B2.001_106	Multiple		Unclassified
ACD20_32734.42697.14G0001	MEL.A1_1632	MEL.B1.007_25	MEL.B2.002_300	Euryarchaeota	K06920	Unclassified
ACD20_32734.42697.14G0002	MEL.A1_1633	MEL.B1.007_26	MEL.B2.002_299	Euryarchaeota		Unclassified
ACD20_32734.42697.14G0006	MEL.A1_791	MEL.B1.003_327	MEL.B2.002_181	Firmicutes	K03608	Unclassified
ACD20_32734.42697.14G0007	MEL.A1_792	MEL.B1.003_326	MEL.B2.002_182	Multiple	K03609	Unclassified
ACD20_32734.42697.14G0008	MEL.A1_793	MEL.B1.003_325	MEL.B2.002_183	Firmicutes	K03610	Unclassified
ACD20_32734.42697.14G0009	MEL.A1_660	MEL.B1.005_85	MEL.B2.001_220	Multiple	K01448	Unclassified
ACD20_32734.42697.14G0014	MEL.A1_68	MEL.B1.008_70	MEL.B2.001_316	Multiple	K02337	Multiple
ACD20_32734.42697.14G0015	MEL.A1_546	MEL.B1.002_27	MEL.B2.001_577	Firmicutes	K01056	Unclassified
ACD20_32734.42697.14G0016	MEL.A1_1736	MEL.B1.003_134	MEL.B2.002_247	No hit		Unclassified
ACD20_32734.42697.14G0017	MEL.A1_1737	MEL.B1.003_135	MEL.B2.002_248	Proteobacteria	K03088	Unclassified
ACD20_32734.42697.14G0018	MEL.A1_1738	MEL.B1.003_136	MEL.B2.002_249	No hit		Unclassified
ACD20_32734.42697.14G0020	MEL.A1_448	MEL.B1.004_343	MEL.B2.002_158	Firmicutes	K00833	Metabolism
ACD20_32734.42697.14G0023	MEL.A1_1075	MEL.B1.006_181	MEL.B2.006_7	Proteobacteria	K02217	Metabolism
ACD20_32734.42697.14G0032	MEL.A1_862	MEL.B1.008_57	MEL.B2.002_88	Cyanobacteria	K00946	Metabolism
ACD20_32734.42697.14G0033	MEL.A1_861	MEL.B1.008_58	MEL.B2.002_89	Firmicutes	K00991	Metabolism
ACD20_32734.42697.14G0037	MEL.A1_618	MEL.B1.003_374	MEL.B2.006_128	Firmicutes	K04096	Unclassified
ACD20_32734.42697.14G0038	MEL.A1_619	MEL.B1.003_375	MEL.B2.004_155	Multiple	K03168	Unclassified
ACD20_32734.42697.14G0040	MEL.A1_620	MEL.B1.001_30	MEL.B2.004_154	Multiple	K00014	Metabolism
ACD20_32734.42697.14G0041	MEL.A1_351	MEL.B1.001_182	MEL.B2.001_531	Firmicutes	K08223	Unclassified
ACD20_33459.44052.13G0001	MEL.A1_923	MEL.B1.001_202	MEL.B2.001_254	Firmicutes	K06381	Unclassified
ACD20_33459.44052.13G0004	MEL.A1_234	MEL.B1.002_115	MEL.B2.002_309	Cyanobacteria		Unclassified
ACD20_33459.44052.13G0006	MEL.A1_1783	MEL.B1.001_247	MEL.B2.005_3	Cyanobacteria	K01586	Metabolism
ACD20_33459.44052.13G0007	MEL.A1_1784	MEL.B1.001_246	MEL.B2.005_4	Firmicutes		Unclassified
ACD20_33459.44052.13G0009	MEL.A1_215	MEL.B1.001_107	MEL.B2.001_636	Firmicutes	K00970	Unclassified
ACD20_33459.44052.13G0010	MEL.A1_216	MEL.B1.001_108	MEL.B2.001_635	Firmicutes	K09761	Unclassified
ACD20_33459.44052.13G0015	MEL.A1_843	MEL.B1.008_30	MEL.B2.002_427	Multiple	K00761	Metabolism
ACD20_33459.44052.13G0024	MEL.A1_181	MEL.B1.002_90	MEL.B2.001_216	Multiple	K03524	Metabolism
ACD20_33459.44052.13G0030	MEL.A1_1064	MEL.B1.001_96	MEL.B2.001_275	Firmicutes	K01012	Metabolism
ACD20_33459.44052.13G0031	MEL.A1_510	MEL.B1.001_301	MEL.B2.001_276	Cyanobacteria	K03550	Genetic Information Processing
ACD20_33459.44052.13G0033	MEL.A1_1030	MEL.B1.004_233	MEL.B2.006_20	Multiple	K09458	Metabolism
ACD20_33459.44052.13G0034	MEL.A1_1031	MEL.B1.004_232	MEL.B2.006_21	Multiple	K02078	Unclassified
ACD20_33459.44052.13G0035	MEL.A1_1032	MEL.B1.004_230	MEL.B2.006_22	Multiple	K00059	Metabolism
ACD20_33459.44052.13G0036	MEL.A1_1034	MEL.B1.004_228	MEL.B2.006_23	Multiple	K00645	Metabolism
ACD20_33459.44052.13G0037	MEL.A1_1036	MEL.B1.004_227	MEL.B2.006_24	Multiple	K00648	Metabolism
ACD20_33459.44052.13G0038	MEL.A1_1037	MEL.B1.004_226	MEL.B2.006_25	Multiple	K03621	Metabolism
ACD20_33459.44052.13G0039	MEL.A1_1038	MEL.B1.004_225	MEL.B2.006_26	Firmicutes	K02911	Genetic Information Processing
ACD20_33459.44052.13G0040	MEL.A1_1039	MEL.B1.004_224	MEL.B2.006_27	Cyanobacteria	K07040	Unclassified
ACD20_34658.28158.14G0001	MEL.A1_1693	MEL.B1.007_83	MEL.B2.004_166	Proteobacteria		Unclassified
ACD20_34658.28158.14G0003	MEL.A1_1644	MEL.B1.004_281	MEL.B2.003_204	Multiple		Unclassified
ACD20_34658.28158.14G0006	MEL.A1_1828	MEL.B1.001_508	MEL.B2.002_456	Cyanobacteria	K08300	Genetic Information Processing
ACD20_34658.28158.14G0007	MEL.A1_1827	MEL.B1.001_507	MEL.B2.002_455	Proteobacteria		Unclassified
ACD20_34658.28158.14G0010	MEL.A1_1000	MEL.B1.004_219	MEL.B2.006_131	Multiple	K01872	Genetic Information Processing
ACD20_34658.28158.14G0012	MEL.A1_1096	MEL.B1.003_149	MEL.B2.006_139	Firmicutes	K03789	Unclassified
ACD20_34658.28158.14G0013	MEL.A1_1095	MEL.B1.003_148	MEL.B2.006_138	Cyanobacteria	K03523	Unclassified
ACD20_34658.28158.14G0016	MEL.A1_1348	MEL.B1.002_4	MEL.B2.003_300	Firmicutes	K06168	Unclassified
ACD20_34658.28158.14G0018	MEL.A1_270	MEL.B1.002_54	MEL.B2.004_93	No hit		Unclassified
ACD20_34658.28158.14G0023	MEL.A1_1489	MEL.B1.002_31	MEL.B2.001_461	Firmicutes	K03595	Unclassified
ACD20_347.30611.14G0005	MEL.A1_1571	MEL.B1.004_286	MEL.B2.001_345	No hit		Unclassified
ACD20_347.30611.14G0006	MEL.A1_488	MEL.B1.001_513	MEL.B2.001_346	No hit		Unclassified
ACD20_347.30611.14G0009	MEL.A1_1324	MEL.B1.001_40	MEL.B2.008_2	Proteobacteria	K02956	Genetic Information Processing
ACD20_347.30611.14G0010	MEL.A1_1574	MEL.B1.005_84	MEL.B2.008_39	Multiple	K09698	Genetic Information Processing
ACD20_347.30611.14G0011	MEL.A1_921	MEL.B1.001_203	MEL.B2.001_266	Multiple	K01883	Genetic Information Processing
ACD20_347.30611.14G0012	MEL.A1_1132	MEL.B1.004_284	MEL.B2.004_125	Firmicutes	K11145	Unclassified
ACD20_347.30611.14G0022	MEL.A1_626	MEL.B1.002_20	MEL.B2.001_262	No hit		Unclassified
ACD20_347.30611.14G0023	MEL.A1_211	MEL.B1.004_345	MEL.B2.003_185	Chloroflexi		Unclassified
ACD20_347.30611.14G0025	MEL.A1_1333	MEL.B1.007_107	MEL.B2.003_183	No hit		Unclassified
ACD20_347.30611.14G0029	MEL.A1_265	MEL.B1.006_119	MEL.B2.004_23	Chordata	K13273	Multiple
ACD20_3551.18756.15G0008	MEL.A1_129	MEL.B1.006_123	MEL.B2.001_489	Fusobacteria		Unclassified
ACD20_3551.18756.15G0015	MEL.A1_1339	MEL.B1.008_76	MEL.B2.002_418	Firmicutes	K00973	Metabolism
ACD20_3551.18756.15G0016	MEL.A1_1080	MEL.B1.008_75	MEL.B2.002_419	Firmicutes	K00067	Metabolism
ACD20_3551.18756.15G0017	MEL.A1_1079	MEL.B1.008_74	MEL.B2.002_420	Multiple	K01710	Metabolism
ACD20_3551.18756.15G0018	MEL.A1_1078	MEL.B1.008_73	MEL.B2.002_421	Multiple	K01790	Metabolism
ACD20_3620.49982.14G0001	MEL.A1_113	MEL.B1.005_82	MEL.B2.001_279	Cyanobacteria		Unclassified
ACD20_3620.49982.14G0002	MEL.A1_112	MEL.B1.005_66	MEL.B2.002_503	Firmicutes	K09747	Unclassified
ACD20_3620.49982.14G0003	MEL.A1_111	MEL.B1.005_65	MEL.B2.002_504	Multiple	K06187	Genetic Information Processing
ACD20_3620.49982.14G0009	MEL.A1_147	MEL.B1.005_80	MEL.B2.006_19	Cyanobacteria	K02343	Multiple
ACD20_3620.49982.14G0010	MEL.A1_146	MEL.B1.001_140	MEL.B2.006_18	Fusobacteria	K01297	Unclassified
ACD20_3620.49982.14G0018	MEL.A1_1373	MEL.B1.007_65	MEL.B2.001_609	Multiple		Unclassified
ACD20_3620.49982.14G0019	MEL.A1_1774	MEL.B1.009_21	MEL.B2.006_33	Firmicutes	K09949	Unclassified
ACD20_3620.49982.14G0020	MEL.A1_1775	MEL.B1.009_20	MEL.B2.006_32	Thermodesulfobacteria	K00748	Metabolism
ACD20_3620.49982.14G0021	MEL.A1_81	MEL.B1.003_176	MEL.B2.003_125	Proteobacteria	K09778	Unclassified
ACD20_3620.49982.14G0022	MEL.A1_1429	MEL.B1.008_8	MEL.B2.004_7	Cyanobacteria	K03559	Unclassified
ACD20_3620.49982.14G0023	MEL.A1_1428	MEL.B1.008_7	MEL.B2.004_6	Cyanobacteria	K03559	Unclassified
ACD20_3620.49982.14G0024	MEL.A1_1427	MEL.B1.008_6	MEL.B2.004_5	Cyanobacteria	K03561	Unclassified
ACD20_3620.49982.14G0025	MEL.A1_1426	MEL.B1.008_5	MEL.B2.004_4	Cyanobacteria		Unclassified
ACD20_3620.49982.14G0026	MEL.A1_1425	MEL.B1.008_4	MEL.B2.004_3	No hit		Unclassified
ACD20_3620.49982.14G0027	MEL.A1_1424	MEL.B1.008_3	MEL.B2.002_298	No hit		Unclassified
ACD20_3620.49982.14G0030	MEL.A1_917	MEL.B1.003_62	MEL.B2.006_98	Cyanobacteria	K03625	Unclassified
ACD20_3620.49982.14G0031	MEL.A1_918	MEL.B1.003_61	MEL.B2.006_99	Multiple	K03110	Multiple
ACD20_3620.49982.14G0032	MEL.A1_1210	MEL.B1.002_26	MEL.B2.006_129	Firmicutes	K03106	Multiple
ACD20_3620.49982.14G0035	MEL.A1_1008	MEL.B1.001_324	MEL.B2.002_40	Euryarchaeota		Unclassified
ACD20_3620.49982.14G0037	MEL.A1_1800	MEL.B1.001_32	MEL.B2.002_76	Firmicutes	K07456	Genetic Information Processing
ACD20_3620.49982.14G0040	MEL.A1_1747	MEL.B1.002_111	MEL.B2.001_157	Firmicutes	K07507	Unclassified
ACD20_3620.49982.14G0041	MEL.A1_1746	MEL.B1.007_127	MEL.B2.001_158	Aquificae	K02034	Environmental Information Processing
ACD20_3620.49982.14G0042	MEL.A1_1745	MEL.B1.007_128	MEL.B2.001_159	Cyanobacteria	K02033	Environmental Information Processing
ACD20_3620.49982.14G0043	MEL.A1_1744	MEL.B1.007_129	MEL.B2.004_150	Multiple	K02035	Environmental Information Processing
ACD20_3620.49982.14G0044	MEL.A1_1273	MEL.B1.004_87	MEL.B2.002_441	No hit		Unclassified
ACD20_3620.49982.14G0045	MEL.A1_94	MEL.B1.005_215	MEL.B2.001_257	Multiple	K00789	Metabolism
ACD20_3620.49982.14G0048	MEL.A1_1650	MEL.B1.001_48	MEL.B2.002_170	Cyanobacteria	K01448	Unclassified
ACD20_3620.49982.14G0049	MEL.A1_1651	MEL.B1.001_47	MEL.B2.002_171	Firmicutes	K01776	Metabolism
ACD20_36789.16662.14G0003	MEL.A1_1374	MEL.B1.007_66	MEL.B2.001_608	Multiple		Unclassified
ACD20_36789.16662.14G0004	MEL.A1_372	MEL.B1.001_154	MEL.B2.002_173	Firmicutes		Unclassified
ACD20_36789.16662.14G0005	MEL.A1_371	MEL.B1.001_153	MEL.B2.002_174	Firmicutes	K00969	Metabolism
ACD20_36789.16662.14G0006	MEL.A1_579	MEL.B1.005_221	MEL.B2.002_175	Multiple	K00876	Metabolism
ACD20_36789.16662.14G0007	MEL.A1_1354	MEL.B1.004_18	MEL.B2.002_216	Multiple	K04043	Multiple
ACD20_36789.16662.14G0008	MEL.A1_796	MEL.B1.004_278	MEL.B2.004_40	No hit	K03075	Multiple
ACD20_36789.16662.14G0010	MEL.A1_471	MEL.B1.002_124	MEL.B2.004_41	Proteobacteria	K09131	Unclassified
ACD20_36789.16662.14G0011	MEL.A1_470	MEL.B1.004_131	MEL.B2.004_42	Multiple	K01139	Metabolism
ACD20_36789.16662.14G0013	MEL.A1_1341	MEL.B1.003_271	MEL.B2.002_285	Multiple	K13685	Unclassified
ACD20_36789.16662.14G0014	MEL.A1_1340	MEL.B1.003_272	MEL.B2.002_284	Firmicutes	K00600	Metabolism
ACD20_3687.9710.14G0004	MEL.A1_804	MEL.B1.001_52	MEL.B2.006_29	No hit		Unclassified
ACD20_3687.9710.14G0005	MEL.A1_973	MEL.B1.005_96	MEL.B2.003_136	Firmicutes	K01207	Metabolism
ACD20_3687.9710.14G0007	MEL.A1_1177	MEL.B1.001_131	MEL.B2.001_127	Proteobacteria		Unclassified
ACD20_39063.17082.14G0002	MEL.A1_830	MEL.B1.003_226	MEL.B2.006_95	Multiple	K06997	Unclassified
ACD20_39063.17082.14G0003	MEL.A1_829	MEL.B1.003_225	MEL.B2.006_94	Cyanobacteria	K09772	Unclassified
ACD20_39063.17082.14G0005	MEL.A1_1532	MEL.B1.003_208	MEL.B2.002_477	Firmicutes	K07160	Unclassified
ACD20_39063.17082.14G0007	MEL.A1_627	MEL.B1.004_242	MEL.B2.001_327	Proteobacteria	K07460	Unclassified
ACD20_39063.17082.14G0010	MEL.A1_268	MEL.B1.001_460	MEL.B2.001_246	Firmicutes	K03294	Unclassified
ACD20_40617.48787.13G0001	MEL.A1_318	MEL.B1.005_178	MEL.B2.002_486	Multiple		Unclassified
ACD20_40617.48787.13G0003	MEL.A1_17	MEL.B1.004_238	MEL.B2.002_370	Multiple	K10206	Metabolism
ACD20_40617.48787.13G0004	MEL.A1_1286	MEL.B1.004_100	MEL.B2.006_47	Cyanobacteria	K05808	Unclassified
ACD20_40617.48787.13G0005	MEL.A1_713	MEL.B1.001_24	MEL.B2.002_235	No hit		Unclassified
ACD20_40617.48787.13G0011	MEL.A1_809	MEL.B1.002_137	MEL.B2.002_345	Synergistetes	K00983	Metabolism
ACD20_40617.48787.13G0013	MEL.A1_14	MEL.B1.007_34	MEL.B2.001_470	Firmicutes		Unclassified
ACD20_40617.48787.13G0016	MEL.A1_878	MEL.B1.005_239	MEL.B2.001_141	Multiple	K00806	Metabolism
ACD20_40617.48787.13G0017	MEL.A1_879	MEL.B1.004_102	MEL.B2.001_142	Multiple	K01516	Metabolism
ACD20_40617.48787.13G0022	MEL.A1_1309	MEL.B1.002_5	MEL.B2.006_113	Cyanobacteria	K01775	Metabolism
ACD20_40617.48787.13G0023	MEL.A1_76	MEL.B1.001_295	MEL.B2.004_69	Proteobacteria		Unclassified
ACD20_40617.48787.13G0025	MEL.A1_82	MEL.B1.008_43	MEL.B2.002_325	Firmicutes	K03545	Unclassified
ACD20_40617.48787.13G0026	MEL.A1_83	MEL.B1.002_67	MEL.B2.002_326	Multiple	K01358	Cellular Processes
ACD20_40617.48787.13G0027	MEL.A1_85	MEL.B1.002_68	MEL.B2.002_327	Cyanobacteria	K03544	Cellular Processes
ACD20_40617.48787.13G0029	MEL.A1_834	MEL.B1.003_52	MEL.B2.004_105	Multiple	K03572	Genetic Information Processing
ACD20_40617.48787.13G0031	MEL.A1_441	MEL.B1.004_81	MEL.B2.001_633	Chloroflexi		Unclassified
ACD20_40617.48787.13G0032	MEL.A1_631	MEL.B1.002_53	MEL.B2.002_330	Proteobacteria		Unclassified
ACD20_40617.48787.13G0040	MEL.A1_1553	MEL.B1.001_212	MEL.B2.001_281	Multiple	K01627	Metabolism
ACD20_4629.12489.10G0003	MEL.A1_1729	MEL.B1.004_163	MEL.B2.005_112	Multiple	K03892	Unclassified
ACD20_47045.25689.14G0005	MEL.A1_1347	MEL.B1.002_70	MEL.B2.006_69	Multiple	K01710	Unclassified
ACD20_47045.25689.14G0008	MEL.A1_411	MEL.B1.005_137	MEL.B2.006_68	Spirochaetes	K00012	Metabolism
ACD20_47045.25689.14G0010	MEL.A1_736	MEL.B1.004_52	MEL.B2.002_96	Firmicutes	K01493	Metabolism
ACD20_47045.25689.14G0012	MEL.A1_761	MEL.B1.003_128	MEL.B2.003_263	No hit		Unclassified
ACD20_47045.25689.14G0013	MEL.A1_760	MEL.B1.003_129	MEL.B2.003_262	Multiple	K02666	Unclassified
ACD20_47045.25689.14G0014	MEL.A1_759	MEL.B1.003_130	MEL.B2.003_261	Multiple	K02652	Unclassified
ACD20_47045.25689.14G0015	MEL.A1_758	MEL.B1.003_131	MEL.B2.003_260	Multiple	K02653	Unclassified
ACD20_47045.25689.14G0019	MEL.A1_931	MEL.B1.001_78	MEL.B2.003_106	Proteobacteria	K08963	Metabolism
ACD20_47045.25689.14G0020	MEL.A1_1464	MEL.B1.001_148	MEL.B2.004_114	No hit		Unclassified
ACD20_47045.25689.14G0021	MEL.A1_1465	MEL.B1.001_149	MEL.B2.004_2	Firmicutes	K07277	Unclassified
ACD20_47045.25689.14G0023	MEL.A1_1438	MEL.B1.007_40	MEL.B2.002_429	No hit		Unclassified
ACD20_47743.9433.13G0006	MEL.A1_1728	MEL.B1.004_162	MEL.B2.005_111	Multiple	K01533	Unclassified
ACD20_48423.8389.14G0001	MEL.A1_1217	MEL.B1.004_38	MEL.B2.001_218	Multiple	K09157	Unclassified
ACD20_48423.8389.14G0002	MEL.A1_934	MEL.B1.006_28	MEL.B2.001_217	Firmicutes	K07166	Unclassified
ACD20_48423.8389.14G0003	MEL.A1_994	MEL.B1.007_111	MEL.B2.002_494	Proteobacteria		Unclassified
ACD20_48423.8389.14G0004	MEL.A1_993	MEL.B1.007_112	MEL.B2.002_495	Not enough hits		Unclassified
ACD20_48423.8389.14G0005	MEL.A1_992	MEL.B1.007_113	MEL.B2.002_496	Cyanobacteria	K03686	Unclassified
ACD20_48423.8389.14G0006	MEL.A1_991	MEL.B1.007_114	MEL.B2.002_497	Multiple	K03687	Unclassified
ACD20_50631.62921.14G0013	MEL.A1_1749	MEL.B1.003_262	MEL.B2.008_13	Not enough hits		Unclassified
ACD20_50631.62921.14G0014	MEL.A1_1750	MEL.B1.003_261	MEL.B2.008_12	Firmicutes		Unclassified
ACD20_50631.62921.14G0015	MEL.A1_1351	MEL.B1.004_125	MEL.B2.002_93	Firmicutes		Unclassified
ACD20_50631.62921.14G0020	MEL.A1_656	MEL.B1.006_9	MEL.B2.002_277	Multiple	K01443	Metabolism
ACD20_50631.62921.14G0021	MEL.A1_1809	MEL.B1.007_93	MEL.B2.004_104	No hit		Unclassified
ACD20_50631.62921.14G0024	MEL.A1_1040	MEL.B1.004_223	MEL.B2.004_16	No hit		Unclassified
ACD20_50631.62921.14G0025	MEL.A1_269	MEL.B1.003_40	MEL.B2.002_232	Firmicutes	K01810	Metabolism
ACD20_50631.62921.14G0027	MEL.A1_278	MEL.B1.001_382	MEL.B2.001_366	Cyanobacteria	K00820	Metabolism
ACD20_50631.62921.14G0028	MEL.A1_1815	MEL.B1.005_224	MEL.B2.004_29	No hit		Unclassified
ACD20_50631.62921.14G0029	MEL.A1_1674	MEL.B1.003_166	MEL.B2.001_214	Firmicutes	K02887	Genetic Information Processing
ACD20_50631.62921.14G0030	MEL.A1_1673	MEL.B1.003_165	MEL.B2.001_213	Cyanobacteria	K02916	Genetic Information Processing
ACD20_50631.62921.14G0031	MEL.A1_390	MEL.B1.003_97	MEL.B2.008_17	Cyanobacteria	K02520	Unclassified
ACD20_50631.62921.14G0034	MEL.A1_31	MEL.B1.003_143	MEL.B2.001_339	Multiple	K01619	Metabolism
ACD20_50631.62921.14G0036	MEL.A1_154	MEL.B1.005_185	MEL.B2.001_516	Euryarchaeota		Unclassified
ACD20_50631.62921.14G0038	MEL.A1_329	MEL.B1.004_347	MEL.B2.004_22	Cyanobacteria	K03655	Genetic Information Processing
ACD20_50631.62921.14G0041	MEL.A1_1068	MEL.B1.008_69	MEL.B2.003_312	Proteobacteria		Unclassified
ACD20_50631.62921.14G0042	MEL.A1_50	MEL.B1.002_38	MEL.B2.004_196	Firmicutes		Unclassified
ACD20_50631.62921.14G0043	MEL.A1_1369	MEL.B1.001_41	MEL.B2.001_209	Multiple	K04518	Metabolism
ACD20_50631.62921.14G0044	MEL.A1_1370	MEL.B1.001_226	MEL.B2.001_210	Cyanobacteria	K01840	Metabolism
ACD20_50631.62921.14G0045	MEL.A1_1628	MEL.B1.003_84	MEL.B2.001_646	Cyanobacteria	K03787	Metabolism
ACD20_50631.62921.14G0046	MEL.A1_718	MEL.B1.007_3	MEL.B2.003_293	Firmicutes	K00639	Metabolism
ACD20_50631.62921.14G0048	MEL.A1_426	MEL.B1.003_39	MEL.B2.001_569	Proteobacteria	K00912	Metabolism
ACD20_50631.62921.14G0049	MEL.A1_425	MEL.B1.005_182	MEL.B2.009_21	Not enough hits		Unclassified
ACD20_50631.62921.14G0050	MEL.A1_18	MEL.B1.005_181	MEL.B2.009_20	Cyanobacteria	K02065	Unclassified
ACD20_50631.62921.14G0051	MEL.A1_19	MEL.B1.005_180	MEL.B2.009_19	Multiple	K02066	Unclassified
ACD20_50631.62921.14G0056	MEL.A1_1565	MEL.B1.001_198	MEL.B2.008_22	Multiple	K01489	Metabolism
ACD20_50631.62921.14G0057	MEL.A1_502	MEL.B1.005_176	MEL.B2.001_647	Firmicutes	K01937	Metabolism
ACD20_50631.62921.14G0058	MEL.A1_503	MEL.B1.005_177	MEL.B2.001_648	Firmicutes	K02435	Genetic Information Processing
ACD20_50631.62921.14G0060	MEL.A1_132	MEL.B1.004_82	MEL.B2.001_632	Cyanobacteria		Unclassified
ACD20_522.8485.14G0001	MEL.A1_1498	MEL.B1.007_101	MEL.B2.004_100	No hit		Unclassified
ACD20_522.8485.14G0002	MEL.A1_679	MEL.B1.004_12	MEL.B2.001_501	Firmicutes	K00940	Metabolism
ACD20_522.8485.14G0003	MEL.A1_678	MEL.B1.004_13	MEL.B2.001_502	Firmicutes	K00773	Unclassified
ACD20_522.8485.14G0004	MEL.A1_1243	MEL.B1.002_72	MEL.B2.008_27	Proteobacteria	K03306	Unclassified
ACD20_522.8485.14G0005	MEL.A1_1242	MEL.B1.002_71	MEL.B2.008_28	Proteobacteria	K07220	Unclassified
ACD20_52423.15315.14G0005	MEL.A1_11	MEL.B1.004_335	MEL.B2.006_119	Cyanobacteria	K02499	Unclassified
ACD20_52423.15315.14G0009	MEL.A1_699	MEL.B1.005_10	MEL.B2.002_193	Firmicutes	K00794	Metabolism
ACD20_52423.15315.14G0010	MEL.A1_1272	MEL.B1.004_86	MEL.B2.002_442	Multiple	K01497	K02858
ACD20_52423.15315.14G0011	MEL.A1_1271	MEL.B1.004_85	MEL.B2.002_443	Firmicutes	K00793	Metabolism
ACD20_52423.15315.14G0012	MEL.A1_696	MEL.B1.005_6	MEL.B2.004_147	Firmicutes		Unclassified
ACD20_52423.15315.14G0014	MEL.A1_612	MEL.B1.004_54	MEL.B2.002_425	Cyanobacteria		Unclassified
ACD20_52423.15315.14G0015	MEL.A1_969	MEL.B1.003_88	MEL.B2.002_426	Firmicutes	K05810	Unclassified
ACD20_52423.15315.14G0016	MEL.A1_432	MEL.B1.007_76	MEL.B2.006_35	Proteobacteria	K00852	Metabolism
ACD20_5277.46502.14G0002	MEL.A1_107	MEL.B1.003_107	MEL.B2.001_121	Firmicutes	K00604	Unclassified
ACD20_5277.46502.14G0006	MEL.A1_1781	MEL.B1.003_185	MEL.B2.001_551	Multiple	K00845	Unclassified
ACD20_5277.46502.14G0007	MEL.A1_1780	MEL.B1.003_186	MEL.B2.001_552	Firmicutes	K01788	Metabolism
ACD20_5277.46502.14G0008	MEL.A1_1529	MEL.B1.001_139	MEL.B2.001_487	Multiple		Unclassified
ACD20_5277.46502.14G0009	MEL.A1_1241	MEL.B1.001_494	MEL.B2.004_20	Firmicutes		Unclassified
ACD20_5277.46502.14G0013	MEL.A1_572	MEL.B1.003_201	MEL.B2.001_638	Cyanobacteria	K03074	Multiple
ACD20_5277.46502.14G0014	MEL.A1_573	MEL.B1.003_202	MEL.B2.001_639	Cyanobacteria	K03072	Multiple
ACD20_5277.46502.14G0016	MEL.A1_275	MEL.B1.002_9	MEL.B2.001_337	Multiple	K02669	Unclassified
ACD20_5277.46502.14G0022	MEL.A1_349	MEL.B1.002_73	MEL.B2.001_132	Cyanobacteria	K00873	Multiple
ACD20_5277.46502.14G0027	MEL.A1_606	MEL.B1.004_96	MEL.B2.001_594	Firmicutes	K02026	Unclassified
ACD20_5277.46502.14G0028	MEL.A1_242	MEL.B1.001_256	MEL.B2.001_152	Firmicutes	K02025	Unclassified
ACD20_5277.46502.14G0031	MEL.A1_243	MEL.B1.001_255	MEL.B2.001_151	Nitrospirae	K01840	Unclassified
ACD20_5277.46502.14G0035	MEL.A1_337	MEL.B1.005_259	MEL.B2.001_542	Cyanobacteria		Unclassified
ACD20_5277.46502.14G0036	MEL.A1_445	MEL.B1.007_19	MEL.B2.001_568	Bacteroidetes	K03317	Unclassified
ACD20_5277.46502.14G0038	MEL.A1_511	MEL.B1.010_18	MEL.B2.001_573	Firmicutes	K02313	Multiple
ACD20_53276.11346.13G0003	MEL.A1_543	MEL.B1.003_14	MEL.B2.001_335	No hit		Unclassified
ACD20_53276.11346.13G0009	MEL.A1_1739	MEL.B1.005_227	MEL.B2.004_88	Multiple	K01738	Metabolism
ACD20_53276.11346.13G0010	MEL.A1_1363	MEL.B1.005_226	MEL.B2.004_89	Multiple	K00640	Metabolism
ACD20_54968.8023.13G0005	MEL.A1_44	MEL.B1.003_108	MEL.B2.002_195	Firmicutes	K11753	Metabolism
ACD20_5553.6893.14G0004	MEL.A1_1661	MEL.B1.004_150	MEL.B2.005_88	No hit		Unclassified
ACD20_5553.6893.14G0005	MEL.A1_1660	MEL.B1.004_149	MEL.B2.005_87	No hit		Unclassified
ACD20_5553.6893.14G0006	MEL.A1_1659	MEL.B1.004_148	MEL.B2.005_86	No hit		Unclassified
ACD20_5553.6893.14G0008	MEL.A1_1657	MEL.B1.004_146	MEL.B2.001_108	Firmicutes		Unclassified
ACD20_55763.26714.14G0002	MEL.A1_655	MEL.B1.003_355	MEL.B2.003_315	Multiple	K01687	Metabolism
ACD20_55763.26714.14G0004	MEL.A1_1711	MEL.B1.003_260	MEL.B2.008_5	No hit		Unclassified
ACD20_55763.26714.14G0007	MEL.A1_1172	MEL.B1.003_22	MEL.B2.003_199	Firmicutes	K10039	Environmental Information Processing
ACD20_55763.26714.14G0010	MEL.A1_1816	MEL.B1.005_223	MEL.B2.004_28	Firmicutes	K02860	Unclassified
ACD20_55763.26714.14G0011	MEL.A1_1817	MEL.B1.005_222	MEL.B2.004_27	Firmicutes	K00554	Unclassified
ACD20_55763.26714.14G0012	MEL.A1_1683	MEL.B1.003_144	MEL.B2.003_14	Euryarchaeota	K06153	Metabolism
ACD20_55763.26714.14G0017	MEL.A1_1397	MEL.B1.007_42	MEL.B2.002_431	Firmicutes	K00104	Metabolism
ACD20_55763.26714.14G0018	MEL.A1_652	MEL.B1.001_496	MEL.B2.002_226	Multiple	K11473	Metabolism
ACD20_55763.26714.14G0022	MEL.A1_366	MEL.B1.004_178	MEL.B2.012_3	Proteobacteria	K02282	Unclassified
ACD20_5712.36246.14G0002	MEL.A1_845	MEL.B1.001_161	MEL.B2.002_380	No hit		Unclassified
ACD20_5712.36246.14G0003	MEL.A1_651	MEL.B1.004_30	MEL.B2.002_212	Multiple	K00286	Metabolism
ACD20_5712.36246.14G0005	MEL.A1_650	MEL.B1.004_53	MEL.B2.002_211	No hit		Unclassified
ACD20_5712.36246.14G0006	MEL.A1_649	MEL.B1.008_33	MEL.B2.002_210	No hit	K03536	Unclassified
ACD20_5712.36246.14G0007	MEL.A1_730	MEL.B1.006_120	MEL.B2.006_126	Multiple	K08998	Unclassified
ACD20_5712.36246.14G0008	MEL.A1_422	MEL.B1.001_415	MEL.B2.002_205	Cyanobacteria	K03217	Multiple
ACD20_5712.36246.14G0009	MEL.A1_1329	MEL.B1.006_128	MEL.B2.001_575	Firmicutes	K03650	Unclassified
ACD20_5712.36246.14G0013	MEL.A1_1023	MEL.B1.002_77	MEL.B2.001_296	Firmicutes	K00970	Genetic Information Processing
ACD20_5712.36246.14G0015	MEL.A1_224	MEL.B1.001_498	MEL.B2.003_148	No hit		Unclassified
ACD20_5712.36246.14G0030	MEL.A1_1312	MEL.B1.003_209	MEL.B2.006_121	Spirochaetes	K00931	Metabolism
ACD20_5712.36246.14G0031	MEL.A1_1313	MEL.B1.001_16	MEL.B2.006_122	Spirochaetes	K00147	Metabolism
ACD20_5712.36246.14G0033	MEL.A1_1168	MEL.B1.004_26	MEL.B2.001_227	Multiple	K02338	Multiple
ACD20_5712.36246.14G0034	MEL.A1_712	MEL.B1.009_18	MEL.B2.001_493	Firmicutes	K03629	Genetic Information Processing
ACD20_5712.36246.14G0035	MEL.A1_1279	MEL.B1.001_124	MEL.B2.006_137	No hit		Unclassified
ACD20_58194.49390.14G0001	MEL.A1_1757	MEL.B1.005_22	MEL.B2.001_520	Firmicutes		Unclassified
ACD20_58194.49390.14G0003	MEL.A1_1684	MEL.B1.003_145	MEL.B2.003_13	Proteobacteria	K01737	Metabolism
ACD20_58194.49390.14G0005	MEL.A1_871	MEL.B1.001_355	MEL.B2.001_168	Multiple	K00942	Metabolism
ACD20_58194.49390.14G0006	MEL.A1_873	MEL.B1.006_75	MEL.B2.001_352	Firmicutes		Unclassified
ACD20_58194.49390.14G0008	MEL.A1_1018	MEL.B1.003_217	MEL.B2.003_23	Multiple	K00003	Metabolism
ACD20_58194.49390.14G0009	MEL.A1_1029	MEL.B1.003_210	MEL.B2.003_24	Multiple	K01733	Metabolism
ACD20_58194.49390.14G0012	MEL.A1_1593	MEL.B1.008_45	MEL.B2.001_250	Multiple		Unclassified
ACD20_58194.49390.14G0014	MEL.A1_738	MEL.B1.005_94	MEL.B2.006_109	No hit		Unclassified
ACD20_58194.49390.14G0021	MEL.A1_672	MEL.B1.001_157	MEL.B2.001_198	Cyanobacteria	K03429	Metabolism
ACD20_58194.49390.14G0024	MEL.A1_274	MEL.B1.002_8	MEL.B2.001_338	Firmicutes	K03584	Genetic Information Processing
ACD20_58194.49390.14G0027	MEL.A1_464	MEL.B1.003_171	MEL.B2.007_10	Cyanobacteria	K04485	Unclassified
ACD20_58194.49390.14G0028	MEL.A1_1682	MEL.B1.007_90	MEL.B2.001_372	No hit		Unclassified
ACD20_58194.49390.14G0029	MEL.A1_1681	MEL.B1.007_89	MEL.B2.001_373	No hit		Unclassified
ACD20_58194.49390.14G0030	MEL.A1_1680	MEL.B1.007_88	MEL.B2.001_374	Not enough hits		Unclassified
ACD20_58194.49390.14G0031	MEL.A1_1557	MEL.B1.004_243	MEL.B2.001_384	Firmicutes	K02434	Genetic Information Processing
ACD20_58194.49390.14G0032	MEL.A1_1381	MEL.B1.008_35	MEL.B2.001_457	Proteobacteria		Unclassified
ACD20_58194.49390.14G0033	MEL.A1_1343	MEL.B1.001_365	MEL.B2.009_22	Firmicutes	K03703	Genetic Information Processing
ACD20_62664.18138.14G0002	MEL.A1_604	MEL.B1.003_278	MEL.B2.004_38	Firmicutes	K08303	Unclassified
ACD20_62664.18138.14G0003	MEL.A1_603	MEL.B1.003_279	MEL.B2.004_39	Firmicutes	K07015	Unclassified
ACD20_62664.18138.14G0008	MEL.A1_1797	MEL.B1.004_270	MEL.B2.002_274	Proteobacteria	K08309	Unclassified
ACD20_62664.18138.14G0009	MEL.A1_726	MEL.B1.007_13	MEL.B2.005_10	Multiple	K10112	Environmental Information Processing
ACD20_62664.18138.14G0011	MEL.A1_1515	MEL.B1.003_98	MEL.B2.003_181	No hit		Unclassified
ACD20_62664.18138.14G0012	MEL.A1_979	MEL.B1.007_72	MEL.B2.003_54	Firmicutes	K02902	Genetic Information Processing
ACD20_6299.103852.14G0005	MEL.A1_137	MEL.B1.002_21	MEL.B2.006_100	Bacteroidetes		Unclassified
ACD20_6299.103852.14G0014	MEL.A1_676	MEL.B1.003_154	MEL.B2.008_48	Firmicutes	K03555	Genetic Information Processing
ACD20_6299.103852.14G0015	MEL.A1_675	MEL.B1.003_153	MEL.B2.006_116	No hit		Unclassified
ACD20_6299.103852.14G0017	MEL.A1_1069	MEL.B1.001_121	MEL.B2.002_133	No hit		Unclassified
ACD20_6299.103852.14G0023	MEL.A1_530	MEL.B1.002_36	MEL.B2.002_156	Multiple	K00989	Unclassified
ACD20_6299.103852.14G0024	MEL.A1_1178	MEL.B1.004_7	MEL.B2.002_155	Firmicutes	K01874	Multiple
ACD20_6299.103852.14G0025	MEL.A1_397	MEL.B1.007_74	MEL.B2.003_328	Firmicutes	K03424	Unclassified
ACD20_6299.103852.14G0028	MEL.A1_1668	MEL.B1.005_191	MEL.B2.001_582	Multiple	K01924	Metabolism
ACD20_6299.103852.14G0029	MEL.A1_1669	MEL.B1.005_192	MEL.B2.001_581	Firmicutes	K00075	Metabolism
ACD20_6299.103852.14G0030	MEL.A1_1670	MEL.B1.005_193	MEL.B2.001_580	Multiple	K01921	Metabolism
ACD20_6299.103852.14G0031	MEL.A1_1671	MEL.B1.005_194	MEL.B2.001_579	No hit		Unclassified
ACD20_6299.103852.14G0033	MEL.A1_1358	MEL.B1.001_165	MEL.B2.004_200	Firmicutes	K02433	Genetic Information Processing
ACD20_6299.103852.14G0044	MEL.A1_1128	MEL.B1.006_98	MEL.B2.002_458	No hit		Unclassified
ACD20_6299.103852.14G0049	MEL.A1_1484	MEL.B1.001_487	MEL.B2.001_462	Elusimicrobia	K07238	Unclassified
ACD20_6299.103852.14G0050	MEL.A1_517	MEL.B1.004_138	MEL.B2.001_379	Proteobacteria		Unclassified
ACD20_6299.103852.14G0056	MEL.A1_1793	MEL.B1.001_346	MEL.B2.002_204	Proteobacteria	K03499	Unclassified
ACD20_6299.103852.14G0057	MEL.A1_1792	MEL.B1.001_347	MEL.B2.002_203	Euryarchaeota	K03498	Unclassified
ACD20_67027.59980.14G0002	MEL.A1_716	MEL.B1.008_56	MEL.B2.001_221	Multiple	K04567	Genetic Information Processing
ACD20_67027.59980.14G0005	MEL.A1_197	MEL.B1.007_10	MEL.B2.002_199	Cyanobacteria	K12600	Unclassified
ACD20_67027.59980.14G0008	MEL.A1_439	MEL.B1.004_79	MEL.B2.004_95	Firmicutes		Unclassified
ACD20_67027.59980.14G0009	MEL.A1_440	MEL.B1.004_80	MEL.B2.004_94	Firmicutes	K06925	Unclassified
ACD20_67027.59980.14G0014	MEL.A1_587	MEL.B1.003_324	MEL.B2.007_28	Firmicutes	K02067	Unclassified
ACD20_67027.59980.14G0016	MEL.A1_1653	MEL.B1.008_44	MEL.B2.001_562	Cyanobacteria		Unclassified
ACD20_67027.59980.14G0017	MEL.A1_360	MEL.B1.002_63	MEL.B2.001_154	Firmicutes	K00760	Metabolism
ACD20_67027.59980.14G0018	MEL.A1_359	MEL.B1.002_62	MEL.B2.001_153	Firmicutes	K04075	Unclassified
ACD20_67027.59980.14G0029	MEL.A1_958	MEL.B1.004_360	MEL.B2.013_3	Firmicutes	K03427	Unclassified
ACD20_67027.59980.14G0036	MEL.A1_953	MEL.B1.004_359	MEL.B2.005_182	Firmicutes	K01153	Unclassified
ACD20_67027.59980.14G0041	MEL.A1_487	MEL.B1.003_34	MEL.B2.002_365	Cyanobacteria	K02899	Genetic Information Processing
ACD20_67027.59980.14G0042	MEL.A1_486	MEL.B1.003_33	MEL.B2.002_366	Multiple	K02888	Genetic Information Processing
ACD20_67027.59980.14G0049	MEL.A1_1778	MEL.B1.004_188	MEL.B2.001_620	Cyanobacteria	K02334	Unclassified
ACD20_67027.59980.14G0055	MEL.A1_1142	MEL.B1.006_113	MEL.B2.008_56	Multiple	K01736	Metabolism
ACD20_67027.59980.14G0056	MEL.A1_1171	MEL.B1.006_114	MEL.B2.008_55	Multiple	K00891	Metabolism
ACD20_67027.59980.14G0057	MEL.A1_1170	MEL.B1.006_115	MEL.B2.008_54	Not enough hits	K01735	Metabolism
ACD20_6884.26272.14G0010	MEL.A1_1331	MEL.B1.004_181	MEL.B2.003_12	Cyanobacteria		Unclassified
ACD20_6884.26272.14G0012	MEL.A1_1666	MEL.B1.005_203	MEL.B2.002_460	No hit		Unclassified
ACD20_6884.26272.14G0013	MEL.A1_1665	MEL.B1.005_204	MEL.B2.002_461	Firmicutes	K03101	Genetic Information Processing
ACD20_6884.26272.14G0016	MEL.A1_1664	MEL.B1.005_205	MEL.B2.002_462	Firmicutes	K06180	Unclassified
ACD20_6884.26272.14G0018	MEL.A1_357	MEL.B1.002_60	MEL.B2.003_16	No hit		Unclassified
ACD20_6884.26272.14G0019	MEL.A1_356	MEL.B1.002_59	MEL.B2.003_17	Firmicutes	K07447	Unclassified
ACD20_6884.26272.14G0020	MEL.A1_355	MEL.B1.002_58	MEL.B2.003_18	Not enough hits		Unclassified
ACD20_6884.26272.14G0021	MEL.A1_354	MEL.B1.002_57	MEL.B2.003_19	No hit		Unclassified
ACD20_6884.26272.14G0023	MEL.A1_701	MEL.B1.004_164	MEL.B2.008_59	No hit	K05838	Unclassified
ACD20_6884.26272.14G0024	MEL.A1_700	MEL.B1.004_165	MEL.B2.008_58	Firmicutes	K06196	Unclassified
ACD20_6884.26272.14G0026	MEL.A1_1152	MEL.B1.005_187	MEL.B2.001_653	Firmicutes	K01935	Metabolism
ACD20_70427.6870.12G0001	MEL.A1_144	MEL.B1.004_139	MEL.B2.004_202	Cyanobacteria	K04487	Multiple
ACD20_70427.6870.12G0002	MEL.A1_145	MEL.B1.004_140	MEL.B2.004_203	Multiple	K13819	Unclassified
ACD20_70427.6870.12G0005	MEL.A1_155	MEL.B1.008_67	MEL.B2.003_116	Firmicutes	K01834	Metabolism
ACD20_71162.23698.13G0008	MEL.A1_1413	MEL.B1.008_52	MEL.B2.002_470	No hit		Unclassified
ACD20_71162.23698.13G0009	MEL.A1_1414	MEL.B1.008_51	MEL.B2.002_471	Firmicutes	K01972	Genetic Information Processing
ACD20_71162.23698.13G0013	MEL.A1_1803	MEL.B1.001_35	MEL.B2.002_188	Multiple	K01507	Metabolism
ACD20_71162.23698.13G0014	MEL.A1_210	MEL.B1.006_5	MEL.B2.004_120	Cyanobacteria		Unclassified
ACD20_71162.23698.13G0019	MEL.A1_1742	MEL.B1.004_214	MEL.B2.001_305	Cyanobacteria	K04078	Unclassified
ACD20_71162.23698.13G0020	MEL.A1_1741	MEL.B1.004_215	MEL.B2.001_306	Multiple	K04077	Multiple
ACD20_71162.23698.13G0024	MEL.A1_1058	MEL.B1.005_97	MEL.B2.002_499	Multiple		Unclassified
ACD20_7213.24407.14G0001	MEL.A1_1290	MEL.B1.004_269	MEL.B2.001_85	Firmicutes	K00845	Metabolism
ACD20_7213.24407.14G0002	MEL.A1_1321	MEL.B1.008_11	MEL.B2.003_327	Multiple	K02340	Multiple
ACD20_7213.24407.14G0003	MEL.A1_1320	MEL.B1.008_10	MEL.B2.003_326	Not enough hits	K02341	Multiple
ACD20_7213.24407.14G0007	MEL.A1_504	MEL.B1.002_46	MEL.B2.001_467	Actinobacteria	K03090	Genetic Information Processing
ACD20_7213.24407.14G0008	MEL.A1_505	MEL.B1.002_45	MEL.B2.001_468	Proteobacteria	K02654	Unclassified
ACD20_7213.24407.14G0010	MEL.A1_1453	MEL.B1.003_384	MEL.B2.008_32	Proteobacteria		Unclassified
ACD20_7213.24407.14G0011	MEL.A1_1455	MEL.B1.003_66	MEL.B2.008_34	Multiple		Unclassified
ACD20_7213.24407.14G0012	MEL.A1_148	MEL.B1.006_73	MEL.B2.006_117	Firmicutes	K11752	Metabolism
ACD20_7213.24407.14G0013	MEL.A1_417	MEL.B1.005_247	MEL.B2.001_265	Multiple	K00859	Metabolism
ACD20_7213.24407.14G0014	MEL.A1_968	MEL.B1.004_126	MEL.B2.001_411	Multiple	K01658	Metabolism
ACD20_7213.24407.14G0016	MEL.A1_209	MEL.B1.001_325	MEL.B2.002_324	Proteobacteria	K00688	Multiple
ACD20_7213.24407.14G0019	MEL.A1_1212	MEL.B1.001_128	MEL.B2.004_141	Multiple	K07024	Unclassified
ACD20_7213.24407.14G0020	MEL.A1_1239	MEL.B1.001_119	MEL.B2.004_140	Multiple	K01770	Metabolism
ACD20_7213.24407.14G0023	MEL.A1_1394	MEL.B1.005_262	MEL.B2.001_407	Firmicutes	K00174	Metabolism
ACD20_7213.24407.14G0024	MEL.A1_1393	MEL.B1.005_263	MEL.B2.001_406	Multiple	K00175	Metabolism
ACD20_7213.24407.14G0025	MEL.A1_1392	MEL.B1.005_264	MEL.B2.001_405	Multiple	K00177	Metabolism
ACD20_7355.8825.14G0001	MEL.A1_1318	MEL.B1.001_420	MEL.B2.001_324	Cyanobacteria		Unclassified
ACD20_7355.8825.14G0002	MEL.A1_1317	MEL.B1.001_421	MEL.B2.001_163	Cyanobacteria		Unclassified
ACD20_7355.8825.14G0003	MEL.A1_1791	MEL.B1.003_55	MEL.B2.003_37	Proteobacteria		Unclassified
ACD20_7355.8825.14G0004	MEL.A1_1790	MEL.B1.003_54	MEL.B2.003_38	Elusimicrobia	K02005	Unclassified
ACD20_7355.8825.14G0005	MEL.A1_1789	MEL.B1.001_142	MEL.B2.003_39	Proteobacteria	K09810	Environmental Information Processing
ACD20_7355.8825.14G0006	MEL.A1_1788	MEL.B1.005_219	MEL.B2.003_40	Proteobacteria	K02004	Unclassified
ACD20_75178.18808.14G0001	MEL.A1_385	MEL.B1.001_466	MEL.B2.012_5	Firmicutes	K01887	Genetic Information Processing
ACD20_75178.18808.14G0002	MEL.A1_430	MEL.B1.001_284	MEL.B2.003_44	No hit		Unclassified
ACD20_75178.18808.14G0003	MEL.A1_1234	MEL.B1.001_58	MEL.B2.001_395	Cyanobacteria	K00948	Metabolism
ACD20_75178.18808.14G0004	MEL.A1_104	MEL.B1.007_63	MEL.B2.001_486	Firmicutes	K04042	Metabolism
ACD20_75178.18808.14G0005	MEL.A1_379	MEL.B1.005_242	MEL.B2.002_266	Multiple	K01945	Metabolism
ACD20_75178.18808.14G0007	MEL.A1_1813	MEL.B1.007_96	MEL.B2.004_30	Proteobacteria	K07560	Unclassified
ACD20_75178.18808.14G0009	MEL.A1_40	MEL.B1.007_122	MEL.B2.006_106	Multiple	K09811	Environmental Information Processing
ACD20_75178.18808.14G0010	MEL.A1_39	MEL.B1.007_123	MEL.B2.006_105	Firmicutes	K09812	Environmental Information Processing
ACD20_75178.18808.14G0012	MEL.A1_576	MEL.B1.007_50	MEL.B2.006_49	Firmicutes	K00615	Metabolism
ACD20_75178.18808.14G0013	MEL.A1_575	MEL.B1.007_49	MEL.B2.006_104	Firmicutes	K05946	Unclassified
ACD20_75178.18808.14G0014	MEL.A1_325	MEL.B1.004_73	MEL.B2.002_186	Firmicutes		Unclassified
ACD20_75178.18808.14G0016	MEL.A1_157	MEL.B1.010_17	MEL.B2.004_36	Cyanobacteria	K02970	Genetic Information Processing
ACD20_75178.18808.14G0017	MEL.A1_1053	MEL.B1.005_123	MEL.B2.001_559	Proteobacteria	K02503	Unclassified
ACD20_7877.13496.11G0001	MEL.A1_4	MEL.B1.001_10	MEL.B2.001_67	Dictyoglomi		Unclassified
ACD20_7877.13496.11G0006	MEL.A1_1626	MEL.B1.005_201	MEL.B2.003_335	Firmicutes	K01752	Metabolism
ACD20_8050.30705.15G0001	MEL.A1_1466	MEL.B1.001_512	MEL.B2.006_134	Firmicutes	K07056	Unclassified
ACD20_8050.30705.15G0002	MEL.A1_725	MEL.B1.007_14	MEL.B2.005_9	Euryarchaeota		Unclassified
ACD20_8050.30705.15G0005	MEL.A1_423	MEL.B1.001_414	MEL.B2.002_208	Firmicutes	K07568	Unclassified
ACD20_8050.30705.15G0007	MEL.A1_1821	MEL.B1.004_124	MEL.B2.002_243	Firmicutes	K02652	Unclassified
ACD20_8050.30705.15G0008	MEL.A1_1822	MEL.B1.004_123	MEL.B2.002_242	Multiple	K07658	Environmental Information Processing
ACD20_8050.30705.15G0009	MEL.A1_1824	MEL.B1.004_122	MEL.B2.002_241	Nitrospirae		Unclassified
ACD20_8050.30705.15G0010	MEL.A1_204	MEL.B1.004_274	MEL.B2.001_205	Cyanobacteria	K06024	Unclassified
ACD20_8050.30705.15G0013	MEL.A1_205	MEL.B1.004_273	MEL.B2.001_211	Euryarchaeota	K05896	Unclassified
ACD20_8050.30705.15G0014	MEL.A1_206	MEL.B1.004_272	MEL.B2.001_212	Euryarchaeota	K03529	Unclassified
ACD20_8050.30705.15G0018	MEL.A1_537	MEL.B1.003_300	MEL.B2.002_152	Multiple	K02836	Unclassified
ACD20_8050.30705.15G0019	MEL.A1_1496	MEL.B1.001_126	MEL.B2.001_543	Firmicutes	K03070	Multiple
ACD20_8050.30705.15G0021	MEL.A1_1779	MEL.B1.001_327	MEL.B2.002_202	Multiple	K01412	Unclassified
ACD20_8050.30705.15G0022	MEL.A1_1589	MEL.B1.005_237	MEL.B2.002_201	Multiple	K01423	Metabolism
ACD20_83.33323.14G0003	MEL.A1_976	MEL.B1.006_140	MEL.B2.001_522	Multiple	K03553	Genetic Information Processing
ACD20_83.33323.14G0004	MEL.A1_665	MEL.B1.008_24	MEL.B2.009_17	Firmicutes	K06950	Unclassified
ACD20_83.33323.14G0005	MEL.A1_666	MEL.B1.008_25	MEL.B2.009_16	Multiple	K09769	Unclassified
ACD20_83.33323.14G0006	MEL.A1_667	MEL.B1.008_26	MEL.B2.009_15	Firmicutes	K07053	Unclassified
ACD20_83.33323.14G0011	MEL.A1_1201	MEL.B1.003_362	MEL.B2.002_34	No hit		Unclassified
ACD20_83.33323.14G0012	MEL.A1_373	MEL.B1.005_236	MEL.B2.004_17	No hit		Unclassified
ACD20_83.33323.14G0014	MEL.A1_799	MEL.B1.003_389	MEL.B2.001_282	Firmicutes	K07391	Unclassified
ACD20_83.33323.14G0018	MEL.A1_418	MEL.B1.005_248	MEL.B2.001_652	Multiple	K06178	Unclassified
ACD20_83.33323.14G0021	MEL.A1_1208	MEL.B1.004_340	MEL.B2.001_278	Multiple	K11749	Cellular Processes
ACD20_83.33323.14G0023	MEL.A1_812	MEL.B1.004_10	MEL.B2.001_277	Cyanobacteria		Unclassified
ACD20_83.33323.14G0024	MEL.A1_152	MEL.B1.001_46	MEL.B2.002_314	Multiple	K01409	Unclassified
ACD20_83.33323.14G0026	MEL.A1_1169	MEL.B1.001_238	MEL.B2.001_243	Firmicutes	K07462	Genetic Information Processing
ACD20_8688.83588.14G0003	MEL.A1_479	MEL.B1.002_98	MEL.B2.006_127	Firmicutes		Unclassified
ACD20_8688.83588.14G0004	MEL.A1_1716	MEL.B1.002_49	MEL.B2.002_279	Chloroflexi	K00826	Metabolism
ACD20_8688.83588.14G0005	MEL.A1_1820	MEL.B1.002_48	MEL.B2.002_280	Acidobacteria	K02066	Unclassified
ACD20_8688.83588.14G0006	MEL.A1_1768	MEL.B1.001_389	MEL.B2.003_27	Firmicutes	K03501	Unclassified
ACD20_8688.83588.14G0007	MEL.A1_1769	MEL.B1.001_388	MEL.B2.003_28	Cyanobacteria		Unclassified
ACD20_8688.83588.14G0008	MEL.A1_1301	MEL.B1.001_112	MEL.B2.002_84	Multiple	K00215	Metabolism
ACD20_8688.83588.14G0009	MEL.A1_1300	MEL.B1.001_113	MEL.B2.002_209	Aquificae	K00133	Metabolism
ACD20_8688.83588.14G0010	MEL.A1_574	MEL.B1.003_203	MEL.B2.003_298	Firmicutes	K01714	Metabolism
ACD20_8688.83588.14G0011	MEL.A1_988	MEL.B1.001_70	MEL.B2.003_268	Firmicutes	K03723	Genetic Information Processing
ACD20_8688.83588.14G0012	MEL.A1_987	MEL.B1.001_71	MEL.B2.003_267	Multiple	K03769	Unclassified
ACD20_8688.83588.14G0013	MEL.A1_1298	MEL.B1.001_115	MEL.B2.003_265	Multiple	K00980	Metabolism
ACD20_8688.83588.14G0016	MEL.A1_1297	MEL.B1.001_116	MEL.B2.002_168	NO RESULT	K02536	Metabolism
ACD20_8688.83588.14G0017	MEL.A1_1296	MEL.B1.001_117	MEL.B2.002_167	Multiple	K02535	Metabolism
ACD20_8688.83588.14G0018	MEL.A1_1295	MEL.B1.001_118	MEL.B2.002_166	Firmicutes	K02372	Metabolism
ACD20_8688.83588.14G0019	MEL.A1_1293	MEL.B1.002_18	MEL.B2.002_165	NO RESULT	K00677	Metabolism
ACD20_8688.83588.14G0023	MEL.A1_807	MEL.B1.001_220	MEL.B2.002_347	Firmicutes	K00928	Metabolism
ACD20_8688.83588.14G0026	MEL.A1_844	MEL.B1.008_31	MEL.B2.002_428	Cyanobacteria	K02067	Unclassified
ACD20_8688.83588.14G0041	MEL.A1_821	MEL.B1.004_327	MEL.B2.001_390	Proteobacteria	K02945	Metabolism
ACD20_8688.83588.14G0042	MEL.A1_820	MEL.B1.004_328	MEL.B2.001_389	Chloroflexi	K02945	Unclassified
ACD20_8688.83588.14G0043	MEL.A1_491	MEL.B1.005_70	MEL.B2.002_228	Multiple	K00008	Unclassified
ACD20_8688.83588.14G0044	MEL.A1_492	MEL.B1.006_10	MEL.B2.002_227	Chloroflexi	K00008	Metabolism
ACD20_8688.83588.14G0047	MEL.A1_1655	MEL.B1.004_144	MEL.B2.006_16	No hit		Unclassified
ACD20_8688.83588.14G0051	MEL.A1_1731	MEL.B1.001_217	MEL.B2.001_565	Firmicutes	K04094	Unclassified
ACD20_8688.83588.14G0053	MEL.A1_558	MEL.B1.001_390	MEL.B2.003_29	Proteobacteria	K02527	Metabolism
ACD20_8688.83588.14G0061	MEL.A1_1024	MEL.B1.009_14	MEL.B2.001_80	No hit		Unclassified
ACD20_8688.83588.14G0062	MEL.A1_1025	MEL.B1.009_13	MEL.B2.001_81	Chloroflexi		Unclassified
ACD20_8688.83588.14G0066	MEL.A1_119	MEL.B1.003_37	MEL.B2.001_356	Firmicutes	K00979	Metabolism
ACD20_8688.83588.14G0068	MEL.A1_1120	MEL.B1.006_179	MEL.B2.006_34	Firmicutes	K03733	Unclassified
ACD20_8838.23082.14G0002	MEL.A1_1583	MEL.B1.001_163	MEL.B2.001_546	Firmicutes	K01265	Unclassified
ACD20_8838.23082.14G0003	MEL.A1_1582	MEL.B1.004_265	MEL.B2.001_547	Multiple	K00939	Metabolism
ACD20_8838.23082.14G0004	MEL.A1_249	MEL.B1.005_17	MEL.B2.003_160	Firmicutes	K03076	Multiple
ACD20_8838.23082.14G0005	MEL.A1_248	MEL.B1.005_16	MEL.B2.003_161	Firmicutes	K02876	Genetic Information Processing
ACD20_8838.23082.14G0006	MEL.A1_247	MEL.B1.005_15	MEL.B2.003_162	Not enough hits	K02907	Genetic Information Processing
ACD20_8838.23082.14G0007	MEL.A1_246	MEL.B1.005_14	MEL.B2.003_163	Cyanobacteria	K02988	Genetic Information Processing
ACD20_8838.23082.14G0008	MEL.A1_1417	MEL.B1.005_257	MEL.B2.001_242	No hit		Unclassified
ACD20_8838.23082.14G0012	MEL.A1_607	MEL.B1.003_198	MEL.B2.004_201	Not enough hits		Unclassified
ACD20_8838.23082.14G0013	MEL.A1_1545	MEL.B1.006_72	MEL.B2.001_200	Cyanobacteria		Unclassified
ACD20_8838.23082.14G0014	MEL.A1_1544	MEL.B1.004_339	MEL.B2.001_199	Firmicutes	K00954	Metabolism
ACD20_8838.23082.14G0022	MEL.A1_1808	MEL.B1.001_211	MEL.B2.004_159	Firmicutes		Unclassified
ACD20_8838.23082.14G0025	MEL.A1_1174	MEL.B1.005_63	MEL.B2.004_54	No hit		Unclassified
ACD20_9246.70483.14G0002	MEL.A1_1203	MEL.B1.003_81	MEL.B2.002_307	Multiple	K01892	Genetic Information Processing
ACD20_9246.70483.14G0003	MEL.A1_985	MEL.B1.004_135	MEL.B2.002_221	No hit		Unclassified
ACD20_9246.70483.14G0012	MEL.A1_431	MEL.B1.001_283	MEL.B2.003_45	Firmicutes	K00528	Unclassified
ACD20_9246.70483.14G0014	MEL.A1_121	MEL.B1.005_150	MEL.B2.002_312	Cyanobacteria	K11329	Environmental Information Processing
ACD20_9246.70483.14G0015	MEL.A1_1579	MEL.B1.004_55	MEL.B2.001_508	Multiple		Unclassified
ACD20_9246.70483.14G0017	MEL.A1_1777	MEL.B1.002_110	MEL.B2.007_16	Firmicutes	K01129	Metabolism
ACD20_9246.70483.14G0018	MEL.A1_1180	MEL.B1.005_90	MEL.B2.003_2	Cyanobacteria	K02316	Genetic Information Processing
ACD20_9246.70483.14G0019	MEL.A1_1179	MEL.B1.005_91	MEL.B2.003_3	Firmicutes	K03086	Unclassified
ACD20_9246.70483.14G0022	MEL.A1_518	MEL.B1.004_137	MEL.B2.001_93	Firmicutes	K00783	Unclassified
ACD20_9246.70483.14G0023	MEL.A1_826	MEL.B1.006_39	MEL.B2.002_382	Cyanobacteria	K03531	Cellular Processes
ACD20_9246.70483.14G0028	MEL.A1_1166	MEL.B1.005_62	MEL.B2.003_58	Not enough hits	K06199	Unclassified
ACD20_9246.70483.14G0031	MEL.A1_887	MEL.B1.003_253	MEL.B2.001_349	No hit		Unclassified
ACD20_9246.70483.14G0045	MEL.A1_1810	MEL.B1.007_94	MEL.B2.004_34	Firmicutes	K06941	Unclassified
ACD20_9246.70483.14G0047	MEL.A1_46	MEL.B1.003_159	MEL.B2.004_146	Firmicutes	K01876	Genetic Information Processing
ACD20_9246.70483.14G0048	MEL.A1_693	MEL.B1.005_13	MEL.B2.001_323	Cyanobacteria	K09775	Unclassified
ACD20_9246.70483.14G0049	MEL.A1_692	MEL.B1.005_12	MEL.B2.001_322	Cyanobacteria	K13789	Metabolism
ACD20_9246.70483.14G0050	MEL.A1_691	MEL.B1.005_11	MEL.B2.001_321	Firmicutes	K06949	Unclassified
ACD20_9246.70483.14G0054	MEL.A1_493	MEL.B1.003_190	MEL.B2.001_201	Cyanobacteria		Unclassified
ACD20_9246.70483.14G0061	MEL.A1_332	MEL.B1.008_63	MEL.B2.004_25	Firmicutes	K01808	Metabolism
ACD20_9246.70483.14G0063	MEL.A1_925	MEL.B1.004_222	MEL.B2.001_256	Chloroflexi	K07566	Unclassified
ACD20_9246.70483.14G0064	MEL.A1_230	MEL.B1.004_300	MEL.B2.002_303	Multiple	K02950	Genetic Information Processing
ACD20_9246.70483.14G0065	MEL.A1_229	MEL.B1.004_299	MEL.B2.002_304	Firmicutes	K02992	Genetic Information Processing
ACD20_9246.70483.14G0066	MEL.A1_877	MEL.B1.003_123	MEL.B2.001_70	Cyanobacteria	K02355	Unclassified
ACD20_93193.37104.15G0030	MEL.A1_52	MEL.B1.003_76	MEL.B2.003_122	Cyanobacteria		Unclassified
ACD20_93193.37104.15G0032	MEL.A1_1441	MEL.B1.003_293	MEL.B2.001_591	Cyanobacteria	K08309	Unclassified
ACD20_94322.31132.13G0001	MEL.A1_189	MEL.B1.003_191	MEL.B2.003_207	Proteobacteria	K00975	Metabolism
ACD20_94322.31132.13G0002	MEL.A1_1161	MEL.B1.006_89	MEL.B2.003_168	Multiple	K03596	Unclassified
ACD20_94322.31132.13G0003	MEL.A1_1530	MEL.B1.005_235	MEL.B2.002_381	Fusobacteria	K02968	Genetic Information Processing
ACD20_94322.31132.13G0009	MEL.A1_1072	MEL.B1.003_316	MEL.B2.002_213	Multiple		Unclassified
ACD20_94322.31132.13G0012	MEL.A1_984	MEL.B1.005_233	MEL.B2.004_53	Firmicutes	K07478	Unclassified
ACD20_94322.31132.13G0014	MEL.A1_51	MEL.B1.004_262	MEL.B2.001_131	Proteobacteria	K03502	Unclassified
ACD20_94322.31132.13G0016	MEL.A1_571	MEL.B1.001_75	MEL.B2.006_10	Cyanobacteria	K00097	Metabolism
ACD20_94322.31132.13G0017	MEL.A1_570	MEL.B1.001_74	MEL.B2.006_11	Firmicutes		Unclassified
ACD20_94322.31132.13G0018	MEL.A1_569	MEL.B1.001_73	MEL.B2.006_12	Cyanobacteria	K03111	Genetic Information Processing
ACD20_94322.31132.13G0020	MEL.A1_99	MEL.B1.004_250	MEL.B2.001_249	Thermotogae	K00703	Metabolism
ACD20_94322.31132.13G0021	MEL.A1_442	MEL.B1.005_67	MEL.B2.003_316	Proteobacteria		Unclassified
ACD20_94322.31132.13G0023	MEL.A1_741	MEL.B1.003_357	MEL.B2.002_433	No hit		Unclassified
ACD20_94322.31132.13G0024	MEL.A1_742	MEL.B1.003_358	MEL.B2.002_434	No hit		Unclassified
ACD20_94322.31132.13G0026	MEL.A1_743	MEL.B1.003_360	MEL.B2.002_436	No hit		Unclassified
ACD20_94322.31132.13G0031	MEL.A1_501	MEL.B1.002_35	MEL.B2.003_337	Cyanobacteria		Unclassified
ACD20_94582.12496.13G0003	MEL.A1_338	MEL.B1.001_412	MEL.B2.002_297	Firmicutes	K01875	Genetic Information Processing
ACD20_94582.12496.13G0004	MEL.A1_1140	MEL.B1.003_173	MEL.B2.002_289	Firmicutes	K04763	Unclassified
ACD20_94582.12496.13G0007	MEL.A1_466	MEL.B1.006_67	MEL.B2.001_362	No hit		Unclassified
ACD20_94582.12496.13G0010	MEL.A1_1581	MEL.B1.006_214	MEL.B2.002_104	Proteobacteria	K02470	Unclassified
ACD20_97.19794.14G0017	MEL.A1_697	MEL.B1.005_7	MEL.B2.001_170	Multiple	K00057	Metabolism
ACD20_97.19794.14G0018	MEL.A1_849	MEL.B1.001_387	MEL.B2.003_274	Cyanobacteria	K08591	Metabolism
ACD20_97.19794.14G0019	MEL.A1_1158	MEL.B1.009_4	MEL.B2.003_272	Firmicutes	K03977	Unclassified
ACD20_97.19794.14G0021	MEL.A1_1408	MEL.B1.001_7	MEL.B2.001_496	Cyanobacteria		Unclassified
ACD20_99295.14492.14G0003	MEL.A1_819	MEL.B1.004_182	MEL.B2.001_558	Firmicutes	K03086	Unclassified
ACD20_99295.14492.14G0004	MEL.A1_818	MEL.B1.004_183	MEL.B2.001_557	Firmicutes	K03218	Unclassified
ACD20_99295.14492.14G0005	MEL.A1_374	MEL.B1.002_132	MEL.B2.002_99	Firmicutes	K06208	Metabolism
ACD20_994.24575.15G0006	MEL.A1_1701	MEL.B1.006_38	MEL.B2.004_149	Euryarchaeota	K07185	Unclassified
